1 **Parallel lemniscal and non-lemniscal sources control auditory responses in the**  
2 **orbitofrontal cortex (OFC)**

3

4 **Authors:** Hemant K Srivastava<sup>1</sup> and \*Sharba Bandyopadhyay<sup>1,2</sup>

5

6 **Affiliation:** <sup>1</sup>Advanced Technology Development Centre, <sup>2</sup>Department of Electronics and  
7 Electrical Communication Engineering, Indian Institute of Technology Kharagpur, Kharapur,  
8 India 721302

9

10 \*Corresponding Author:

11 Sharba Bandyopadhyay  
12 Department of Electronics and Electrical Communication Engineering  
13 Indian Institute of Technology Kharagpur  
14 Kharagpur 721302  
15 West Bengal, India

16

17

18 **Number of Pages: 58**

19

20 **Number of Figures: 8**

21

22 **Number of Words:** Abstract (220), Introduction (693), Results (6085), Discussion (1949)

23

24 **Keywords:** deviant detection, persistent activity, stimulus history dependence, lemniscal non-  
25 lemniscal auditory pathways, stimulus outcome association

26

27 **Acknowledgements:** HKS thanks IIT Kharagpur, MHRD for Institute Fellowship, SB thanks  
28 Wellcome Trust DBT India Alliance for Grant No. IA/I/11/2500270, MHRD SSLS scheme,  
29 SRIC Challenge Grant and IIT Kharagpur for funding.

30 **Abstract**

31 The orbitofrontal cortex (OFC), controls flexible behavior through stimulus value updating  
32 based on stimulus outcome associations, allowing seamless navigation in dynamic sensory  
33 environments with changing contingencies. Sensory cue driven responses, primarily studied  
34 through behavior, exist in the OFC. However, OFC neurons' sensory response properties,  
35 particularly auditory, are unknown, in the mouse, a genetically tractable animal. We show that  
36 mouse OFC single neurons have unique auditory response properties showing pure deviance  
37 detection and long timescales of adaptation resulting in stimulus-history dependence. Further,  
38 we show that OFC auditory responses are shaped by two parallel sources in the auditory  
39 thalamus, lemniscal and non-lemniscal. The latter underlies a large component of the observed  
40 deviance detection and additionally controls persistent activity in the OFC through the  
41 amygdala. The deviant selectivity can serve as a signal for important changes in the auditory  
42 environment. Such signals if coupled with persistent activity, obtained by disinhibitory control  
43 from the non-lemniscal auditory thalamus or the amygdala, will allow for associations with a  
44 delayed outcome related signal, like reward prediction error, and potentially forms the basis of  
45 updating stimulus outcome associations in the OFC. Thus the baseline sensory responses allow  
46 the behavioral requirement based response modification through relevant inputs from other  
47 structures related to reward, punishment, or memory. Thus, alterations in these responses in  
48 neurological disorders can lead to behavioral deficits.

49

50

51

52

53

54

55 **Introduction:**

56 The OFC, a part of the prefrontal cortex (PFC), is involved in flexible behaviour (Miller and  
57 Cohen, 2001; Wallis, 2007; Fritz et al., 2010) by encoding specific stimulus–outcome or action-  
58 outcome expectancies as well as by dynamically revaluating such expectancies on the basis of  
59 behavioural demands and motivational states (Delamater, 2007; Rudebeck et al., 2008; Wilson  
60 et al., 2014; Fresno et al., 2019). Specific OFC circuits can control specific aspects of flexible  
61 behaviour and multiple reinforcement learning processes (Lee et al., 2012; Groman et al.,  
62 2019). In order for OFC neurons to encode the sensory attributes and subjective value of  
63 outcomes associated with external stimuli (Schoenbaum and Roesch, 2005; Delamater, 2007;  
64 Ostlund and Balleine, 2007) it requires sensory inputs. It is known that sensory stimulus-  
65 evoked signals in the OFC can distinguish between appetitive and aversive outcomes (Morrison  
66 and Salzman, 2011) associated with the stimuli. Further, the OFC also has the capacity to  
67 influence sensory processing by modulating neuronal receptive fields in early sensory cortices,  
68 particularly the auditory cortex (Winkowski et al., 2013).

69 In order to understand how mechanistically specific stimulus outcome associations are created  
70 and how the stimulus evoked OFC responses may influence sensory representation, it becomes  
71 crucial to delve into the origins of sensory inputs and sensory response properties of the OFC.  
72 In the case of auditory stimuli, the pathways involved and their contribution to auditory  
73 responses in the OFC are not known. What aspects of information in the ongoing auditory  
74 environment, how and in what form reaches the OFC would determine how mechanistically  
75 stimulus-outcome expectancies or values would get computed or updated. As a first step, we  
76 consider the auditory evoked responses of OFC neurons, purely from a sensory perspective and  
77 attempt to decipher the crucial components of the auditory pathway involved in shaping  
78 auditory responses and their properties in the OFC.

79 With single unit recordings in both awake and anaesthetized OFC we show that auditory  
80 responses in the OFC are strongly context dependent with long timescale history dependence  
81 and pure deviance detection, unlike the auditory pathway. Investigation of anatomical and  
82 functional sources of inputs show that both the lemniscal and non-lemniscal pathways at the  
83 cortical and sub-cortical levels shape auditory responses in the OFC. With multiple  
84 pharmacological inactivation experiments, the contributions of multiple auditory cortical and  
85 subcortical areas in OFC's auditory responses were assessed. In the auditory cortex (AC), the  
86 dorsal region (AuD), with the most projections to the OFC, surprisingly did not contribute to  
87 auditory responses of the OFC, while the other higher order non-lemniscal ventral auditory  
88 area, AuV (Sacco and Sacchetti, 2010) was found to be the main source of auditory evoked  
89 excitatory drive to the OFC. The primary auditory cortex (A1) contributed to temporal response  
90 properties in the OFC. Further, considering the auditory thalamic (medial geniculate body,  
91 MGB) sources showed that non-lemniscal AuV's contribution to OFC responses originate from  
92 the lemniscal MGBv through its direct projections to AuV (Ohga et al., 2018). The non-  
93 lemniscal, polymodal medial division of MGB, MGBm (Weinberger, 2011; Lee, 2015)  
94 inactivation however caused the OFC auditory responses to become persistent, like frontal  
95 cortex responses during working memory dependent tasks (Fuster and Alexander, 1971;  
96 Funahashi et al., 1989; Schoenbaum and Setlow, 2001). Thus MGBm could be an important  
97 component of the circuit that allows responses to persist for a longer duration depending upon  
98 task demands. Thus the MGBm is a source that causes auditory driven long lasting inhibition  
99 in the OFC. Inactivation of BLA, providing inhibitory inputs (Dilgen et al., 2013; McGarry  
100 and Carter, 2016; Lichtenberg et al., 2017) to the OFC and known to receive MGBm inputs via  
101 the LA, lateral amygdala (Ledoux, 2000; Woodson et al., 2000), showed similar emergence of  
102 auditory driven persistent activity. Thus the MGBm-LA-BLA-OFC pathway provides crucial  
103 inhibitory control on AuV driven auditory responses in the OFC. Further, the same pathway

104 contributed substantially to the strength of deviant selectivity in the OFC. We suggest that the  
105 feedforward inhibition (Dilgen et al., 2013) from BLA to OFC and parallel MGBm to LA  
106 inhibition (Woodson et al., 2000) transmitted to OFC via BLA allow for two independent  
107 controls to generate persistent activity in the OFC required for stimulus outcome associations.  
108

## 109 **Methods**

110 **Animals:** All animal experiments were approved by Institutional Animal Ethics Committee  
111 (IAEC) of Indian Institute of Technology Kharagpur. Animals were reared under a 12-h  
112 light/dark cycle and maintained at a temperature of 22–25 °C and had access to food and water  
113 *ad libitum*. C57BL/6 mice of either sex aged between P-25 to P-45 were used for the  
114 experiments. Data acquired in pharmacological block experiments before blocking were also  
115 included in analysis of OFC responses.

116 Table 1. Experiment wise animals used

| <b>Experiment</b>             | <b>Number of mice</b> |
|-------------------------------|-----------------------|
| OFC Electrophysiology         | 27                    |
| AC Electrophysiology          | 5                     |
| Anatomy                       | 9                     |
| A1 Inactivation (+ Bilateral) | 7 (+ 2)               |
| AuV Inactivation              | 5                     |
| AuD Inactivation              | 3                     |
| MGBv Inactivation             | 2                     |
| MGBm Inactivation             | 5                     |
| BLA Inactivation              | 5                     |
| Awake OFC Electrophysiology   | 5                     |
| <b>Total</b>                  | <b>74</b>             |

117 **Animal Preparation**

118 **Anesthetized recordings:** Animals were anesthetized using Isoflurane (5% for induction and  
119 around 1-1.5 % for maintenance). Body temperature was maintained at 39 °C by placing the  
120 animal on a heating plate. A small incision was made to expose the skull and a metal plate was  
121 attached on to the skull to head fix the animal. Once head fixed, a small (~2 mm dia) craniotomy  
122 was performed to remove the skull over the recording site. For OFC, the stereotaxic coordinates  
123 used were AP=+2.5 mm ML=1 mm from the Bregma, DV=1.8mm (Paxinos and Franklin,  
124 2013) from the brain surface. For AC, the recording site was identified based on vasculature  
125 (Sawatari et al., 2011) . All recordings were performed with a microelectrode array (MEA)  
126 with a 4X4 grid (125 µm between rows and columns) of epoxy-coated tungsten electrodes  
127 (MicroProbes, impedance ~3-5 mega ohms).

128 **Awake head-fixed recordings:** As in the anesthetized case, a similar but smaller craniotomy  
129 (~1 mm dia) was performed and the electrodes were advanced into the recording site and the  
130 held fixed on the skull using Metabond (C & B superbond). A titanium plate was also fixed to  
131 the skull (posterior to the electrodes) with Metabond to head-fix the animal during the  
132 experiments. The Animals were allowed to recover for 5 days and then were habituated with  
133 the recording setup for 30 min for three days before data collection. Data collection lasted for  
134 less than 7 days, with ~1 hour long sessions every day. Units collected on each day from the  
135 recording electrodes were considered as separate units.

136

137 **Stimulus:** All acoustic stimulation was presented from the right side, contralateral to the  
138 recording site. Initially noise bursts (6-48 kHz bandwidth, 50 ms, 5 second gaps, of multiple  
139 intensities – 40 dB to 0 dB attenuation, in 10 dB steps; 0 dB attenuation corresponds to ~95 dB  
140 SPL for tones) were used to obtain threshold sound level for noise. Next single units were  
141 characterized with pure tones (50 ms, 6-48 KHz, 1/2 octave apart, 70-80 dB SPL – depending

142 on noise threshold, 5 seconds apart, except mentioned otherwise) to obtain tuning and the best  
143 frequencies (BF) at the chosen sound level. Next response to a pair of oddball stimulus set was  
144 collected. The oddball stimulus consisted of a standard token (S, 50 ms, either a noise token or  
145 a pure tone) and deviant token (D, 50 ms, either a pure tone or a noise token respectively for  
146 noise-tone, NT or TN, oddball; S and D were both pure tones in case of tone-tone, TT, oddball).  
147 The S-D stream had 15 tokens presented usually at 4 Hz or 3.3 Hz; all the tokens were S tokens  
148 except the 8<sup>th</sup> token (usually) which was the D token. In the second of the pair of oddball  
149 stimulus set the S and D tokens were swapped. Each oddball set was repeated 20-30 times with  
150 a gap of >5s between each repetition. All sound tokens presented in all kinds of stimuli had  
151 5ms rise and fall times. Since recordings were with MEAs with 16 electrodes, the pure tone  
152 frequency was chosen based on the tuning of the majority of simultaneously recorded neurons,  
153 such that the chosen tone frequency was within the pure tone tuning range of most neurons.  
154 The stimuli were generated using a custom written software in MATLAB (Mathworks) and  
155 presented with Tucker Davis Technologies (TDT) ES1 speakers (driven with TDT ED1  
156 drivers) after generation with a TDT RX6 processor and attenuated using a TDT PA5. The  
157 speaker was placed 10 cm away from the contralateral ear.

158

### 159 **Electrophysiology:**

160 **Anesthetized:** The MEA was slowly advanced in to the recording site with the help of a  
161 manipulator (MP-225, Sutter). The electrodes were allowed to settle and stabilize for about 30  
162 min. before the data was acquired. Data were collected using custom written software  
163 (MATLAB), through a unity gain headstage (16 channels, Plexon HST 16o25) amplifier,  
164 followed by a preamplifier (PB3, Plexon, 1000X). Wide-band neural signals (0.7–8 kHz) as  
165 well as a parallel set of 16 channels with spike signals (150 Hz to 8 KHz) were stored after  
166 digitizing at 20 kHz using a A/D board (National Instruments). Off-line analysis was performed

167 with stored data. At the end of the experiment, the animal's brain was harvested for *post hoc*  
168 examination of the recording site.

169 **Awake:** For awake recordings, the animal was placed in a small tube with head protruding out  
170 and fixed using the titanium plate implanted during surgery. Rest of the procedure was similar  
171 to the anesthetized recordings.

172 **Anatomy:** 9 animals were injected with 200 nl of green retrobeads (Lumafluor) into OFC and  
173 3 of them were also injected with 100 nl of anterograde tracing AAV.CB7.CI.mCherry in  
174 MGBv using Nanoject II. After 14 days of injection, the animals were transcardially perfused  
175 with 20 ml PBS followed by 20 ml of 4% Paraformaldehyde and brain was harvested and kept  
176 in 4% paraformaldehyde overnight. 100  $\mu$ m thick brain sections were cut using a vibratome  
177 (Leica VT1000S), mounted on a glass slide with fluomount cover slip, and observed under a  
178 fluorescence microscope (Leica DM2500).

179

180 **Electrophysiology with pharmacological inactivation:** A small burr hole was made on the  
181 skull over the area to be inactivated, ipsilateral (or both sides as mentioned) to the recording  
182 site. A Hamilton syringe (7000 series) loaded with the 200nl of GABA agonists  
183 (5 $\mu$ g/ $\mu$ l muscimol and 2 $\mu$ g/ $\mu$ l baclofen) or equal volume saline was inserted and held via a  
184 cannula implanted on the skull with dental cement. Only after the syringe was positioned  
185 securely, the electrodes were inserted into the recording site as described above. For injecting  
186 the agonists/saline during the experiment, the Hamilton syringe was gently pressed/tapped  
187 multiple times over 5-10 s period to release the entire volume. There was a wait period of 30  
188 mins for the agonists to have their effect before the next data set was acquired. SR101 was  
189 added to the mixture of agonists or saline for *post hoc* confirmation of the target site and spread  
190 of the injection. Different divisions of AC were identified and marked based on the vasculature.



191 For MGB (Slater et al., 2019) and BLA (Luna and Morozov, 2012) following stereotaxic  
192 coordinates were used:

193 MGB: AP= -3.27 mm, ML= 2.0 mm from Bregma, -3.0 mm from the brain surface

194 BLA: AP= -1.3 mm, ML=3.2 mm from Bregma, 3.8 from the brain surface.

195

#### 196 **Data Analysis:**

197 Spike Sorting was done offline in custom written MATLAB software. Data were notch filtered  
198 (Butterworth 4<sup>th</sup> order) to reject any remnant power supply 50Hz oscillations. Spiking activity  
199 was obtained directly from the spike channels of the PBX3 preamp. Waveform fluctuations  
200 above 3.5-4 standard deviations (usually 4) from the baseline were isolated and based on  
201 shapes, spike waveforms were clustered into different groups. The timing of spikes with respect  
202 to data collection onset (and hence also stimulus presentation) were extracted for each spike  
203 shape (single unit) for further analysis. A single unit was considered as responsive if the spike  
204 rate within 400 ms (200 ms in case of awake condition) of stimulus presentation was  
205 significantly different from the baseline (300 ms preceding the stimulus, t-test, alpha=0.05).  
206 Response latency was calculated as the time at which the spike rate in the average peristimulus  
207 time histogram (PSTH, 20ms bins) was maximum.

208 *Narrow tuning and calculation of BF:* Tuning of neurons was considered to be narrow (well-  
209 tuned) or bimodal and/or broad. The frequency corresponding to the maximum response rate  
210 out of the 7 frequencies presented to narrowly-tuned units (below) was considered the BF of  
211 the unit. Those units were narrow -tuned whose average response to frequencies other than one  
212 octave around BF was two standard deviations (variability in response rate at BF) below the  
213 response at BF.

214 *Spatial BF Variability*: The standard deviation of BFs of all the simultaneously acquired units  
215 (only narrowly tuned, above) was normalized by the product of area accommodating these  
216 responding units and the number of units.

$$217 \text{ SpatialBFvariability} = \frac{\text{std}(\text{BFsof simltneouslyacquiredunits})}{\text{area} \times \text{numberofunits}} \dots (1)$$

218 For simulating a distribution of completely heterogeneous BFs, each unit was randomly  
219 assigned a BF (uniformly over the 7 frequencies used) and BF variability was calculated with  
220 1000 bootstraps.

221 *CSI calculation*: For common selectivity index (CSI) calculation, those units were included  
222 which responded to at least one of the four stimulus tokens, first of each of the S tokens in the  
223 oddball pair  $S_X$  and  $S_{XS}$  (XS being the swap of the X oddball), and the deviant tokens,  $D_X$  and  
224  $D_{XS}$ . CSI was calculated as per the following equation (Ulanovsky et al., 2003)

$$225 \text{ CSI} = \frac{(D_X + D_{XS}) - (S_X + S_{XS})}{(D_X + D_{XS}) + (S_X + S_{XS})} \dots (2),$$

226 where,  $S_i/D_{X/XS}$  represent the mean rate response to those tokens –  $S_i$  the  $i^{\text{th}}$  token and  $S_{PT}$  being  
227 the token preceding the  $D$  token. The rate responses in each case were computed based on the  
228 following windows:

229 -For  $S_1$  (100-400 ms from  $S_1$ )

230 -For  $S_{ALL}$  ( $S_2 + 100$  ms - till deviant; entire length)

231 -For  $S_{PT}$  (100ms from  $S_{PT}$  - up to deviant)

232 -For  $D$  (100-400 ms from deviant)

233 When a sufficient sized population (at least 50 units) of paired data was not available (as in the  
234 case of tone-tone, TT oddball and in before versus after pharmacological inactivation  
235 experiments) deviant selectivity index (DSI) of each unit was calculated as follows

$$236 \text{ DSI} = \frac{D_X - S_X}{D_X + S_X} \dots (3).$$

237 *Anatomy:* The number of retrobeads was quantified using a threshold that was manually set for  
238 individual sections depending upon the background intensity. The laminar demarcation was  
239 based on distance from pia, which was also corroborated in a subset with the MGBv projections  
240 observed with AAV.CB7.CI.mCherry. All beads within 300  $\mu\text{m}$  from the pia were marked as  
241 layer 2-3, beads between 300 to 450  $\mu\text{m}$  (or mCherry) were marked as layer 4 and beads below  
242 that were grouped into layer 5-6.

243 Demarcation of AuV, A1 and AuD to confirm correct injections through spread of SR101 in  
244 blocking solution was through brain atlas (Paxinos and Franklin, 2013) and distance from Rf  
245 (rhinal fissure). Only those animals were included in the dataset whose spread was *post hoc*  
246 confirmed as above. Injections in MGBv and MGBm were targeted and *Posthoc* conformed  
247 through brain atlas (Paxinos and Franklin, 2013)

248 *Response duration:* A sliding response window of size 100 ms starting from the stimulus start,  
249 in 20 ms steps, was compared with the random 100 ms window in the baseline for significance.  
250 Consecutive significant bins with a time difference of less than 100 ms between them were  
251 joined together for the determination of response duration.

252 *Spike timing jitter:* The spike timing jitter expressed as variability in the timing of individual  
253 spikes across trials was computed as the reliability ( $R_{\text{corr}}$ ) in spike timing which is a measure  
254 of similarity between pairs of individual spike trains (Schreiber et al., 2003). The trial wise  
255 individual spike trains binned at 1 ms was convolved with a Gaussian filter of  $\sigma=2$  ms and then  
256 coefficient of correlation was calculated between all pairs of trials using the MATLAB function  
257 *corrcoef*. Higher the  $R_{\text{corr}}$  value less is the spike timing jitter.

258 *Pairwise correlations:* Pairwise correlations were calculated as correlation coefficient using  
259 the MATLAB function *corrcoef* between mean PSTHs (from stimulus start) of simultaneously  
260 recorded units.

261

## 262 **Results**

### 263 **OFC neurons respond to sound with very long timescale dependence**

264 OFC single neurons, mainly studied in primates, are known to respond to sounds and other  
265 sensory stimuli. However, response properties of particularly auditory stimuli in the mouse  
266 OFC are not known. Although mouse OFC single neurons have been shown to respond to a  
267 variety of sounds (Winkowski et al., 2017), it is unclear how selective the responses are and  
268 how the responses change under different sensory contexts. Most studies have considered  
269 auditory cue associated responses in the OFC in the context of behavior with single or multiple  
270 cues linked to aspects of behavior. However, in a dynamic natural environment, in which an  
271 animal is required to involve the OFC for the purposes of flexible stimulus value guided  
272 behavior (Wallis, 2007; Groman et al., 2019), the sensory response properties in different  
273 sensory contexts is crucial. To first obtain OFC single neuron responses to sounds, independent  
274 of behavioral state, active memory and other cognitive processes, we considered single units  
275 in the OFC of the anesthetized mice.

276 OFC single unit recordings were performed in the anesthetized mouse in response to auditory  
277 stimuli. The recording sites were confirmed to be in the OFC (lateral and/or ventral), *post-hoc*  
278 by Nissl staining of coronal sections (Fig. 1A). We found that neurons in the mouse OFC  
279 robustly responded to sound stimulation (Fig. 1B and 1C) with broadband noise and pure tones  
280 (also see Winkowski et al., 2017), with typically monotonic rate intensity functions with noise  
281 (Fig. 1B, right) and variety of BFs (Fig. 1Ci-iv) with narrow (Methods, 45% of the responding  
282 units) and bimodal to broad tuning (55% of the responding units, Fig 1Cv-vi). While most of  
283 the responding units increased their firing rate at BF (~86%, 816/949 units), about ~14%  
284 (133/949) of units reduced their firing rate at some frequency (Fig. 1D); 76 of the 133 units  
285 were excited at BF while the rest showed no excitatory responses. Notably the inhibition  
286 observed in all the 133 units (Fig. 1D), were all at either 6 or 8.5 kHz. The mean peak latency

287 observed at the BF of units with excitatory responses was  $284 \pm 3$  ms (Fig. 1e). The latency  
288 was substantially longer than what is observed in the mouse AC single unit responses but has  
289 similar latencies as a late component of auditory responses (Chen et al., 2015), likely in the  
290 nonprimary AC.

291 In order to check for possible topographical organization of tuning based on the narrowly tuned  
292 units in the horizontal plane of the OFC, we considered the variability of BF of units recorded  
293 simultaneously. The distribution of calculated spatial BF variability in simultaneously recorded  
294 units (Eqn. 1, Methods) across all recording locations was compared with the distribution  
295 expected with completely random BFs at each recording site (Methods) (Fig 1E, black arrow  
296 median of data, gray arrow median of the distribution with spatially random BFs). The two  
297 distributions were not significantly different (KS-test,  $p=0.06$ ). Thus we conclude that the local  
298 organization is completely random indicating absence of any BF based organization at the  
299 spatial scales ( $\sim 400$   $\mu\text{m}$ ) of our recording along the horizontal plane in OFC.

300 We used a 5s inter stimulus gap to characterize single unit responses to tones and noise in the  
301 mouse OFC. While, stimulus presentation rates in the auditory pathway, to rule out any effects  
302 of adaptation, have been long established (Antunes et al., 2010), corresponding repetition rates  
303 in the OFC are not known. To investigate effects of adaptation and stimulus history, we  
304 recorded OFC responses to pure tone presentation with varying inter-trial interval (ITI) with  
305 short interval having less than 5s, mid interval ranging from 5s to 7s and long interval ranging  
306 from more than 7s to up to 11s (Fig. 2A and C). Since multiple time scales of adaptation exist  
307 (Ulanovsky et al., 2004) in the auditory cortex itself, we investigated the timescales of  
308 adaptation in the OFC in comparison to AC (Fig. 2B and F, both A1 and AuV; determined  
309 from *post hoc* Nissl stains with electrode tracks). We found that the response profiles of these  
310 three ITIs in the OFC were significantly different (one-way ANOVA Fig. 2C&D). The peak  
311 spike rate of the long ITI group was significantly different (one-way ANOVA,  $p<0.001$ ) from

312 the mid and short ITIs (Fig. 2D), whereas the latency (Fig. 2E) of the short group was  
313 significantly different from the other two groups (one-way ANOVA  $p < 0.01$  between short and  
314 long and  $p < 0.001$  between short and mid). These results indicate that OFC neurons show very  
315 long (at least up to tens of seconds) timescales of stimulus history dependence, reflected in the  
316 spike rate or latency of the response. Similar analyses of the AC neurons (Fig. 2F-H) show that  
317 neither the peak spike rates (Fig. 2F&G) nor the response latencies (Fig. 2H) were different in  
318 the three groups. Thus OFC responses to auditory stimuli were found to have unprecedented  
319 temporal stimulus history dependence. Such remarkable dependence of sensory responses on  
320 long stimulus history, unlike in the sensory cortex, would be crucial in normal environments  
321 with continuously varying sensory inputs, unlike experimental controlled environments.

### 322 **Neurons in the OFC show high context dependence and pure deviance detection unlike** 323 **in the AC**

324 Given the long temporal dependencies, presumably due to strong and long lasting adaptation,  
325 it becomes important to find, to what aspects in streams of sounds, neurons in the OFC respond.  
326 Since most neurons in the OFC are broadly tuned and respond to noise (Fig. 1), we first  
327 considered an oddball stimulus set with noise tokens as the standard (S) stimulus with a tone  
328 embedded in the stream as the D token (Methods). Thus responses of OFC single units to a pair  
329 of NT and TN oddball stimuli were collected. We found that OFC neurons robustly responded  
330 to the D token (Fig. 3A). Typically, a strong onset response to the first of the standards (a  
331 deviant/change from the pre-stimulus silence) was seen, followed by a strong response to the  
332 D. Following both the first S and D, the responses adapted quickly without responding to the  
333 succeeding tokens. Thus the responses in the OFC to odd-ball stimulation show strong and fast  
334 stimulus specific adaptation (Taaseh et al., 2011; Nieto-Diego and Malmierca, 2016).  
335 Oddball stimulus response pairs (NT and TN) from 109 OFC units (10 animals), 218 cases,  
336 where the unit responded at least one of the 4 stimulus tokens ( $S_1$  and D in each of the two in

337 a pair, Methods). In 36% (79/218) of the cases units responded to both the first S token ( $S_1$ )  
338 and the D token ( $S_1=1, D=1$ ; 62/79 NT and 17/79 TN cases, Fig. 3B, black), while in 31%  
339 (68/218) cases units responded to  $S_1$  but not D ( $S_1=1, D=0$ ; 3/68 NT and 65/68 TN cases Fig.  
340 3B, magenta). Further, 17% (37/218) responded to only the D token ( $S_1=0, D=1$ ; 21/37 NT and  
341 16/37 TN cases Fig. 3B, blue) and the remaining 16% did not respond to either. In the last 16%  
342 cases there was however a response to one of the stimulus tokens ( $S_1$  and/or D) in the  
343 corresponding swap oddball stimulus. Thus, although OFC neurons were found to be generally  
344 responsive to both, the tone token and the noise token (Fig. 1, Methods), their response to the  
345 same sound token changed depending on the context of the stimuli. We find that when a neuron  
346 responded to a tone as  $S_1$  (82/109), it was less likely to respond to the noise token as D (65/82  
347 and 17/82,  $p < 0.001$ , *two proportion z-test*). On the contrary, if a neuron responded to the noise  
348 token as  $S_1=1$  (65/109), it was more likely to also respond to the tone token as D (62/65 and  
349 3/65,  $p < 0.001$ , *two proportion z-test*). Such context specific selectivity is contrary to  
350 expectations as a broadband noise as S is likely to adapt all frequency channels thus masking  
351 the response to a tone as D embedded in a sequence of noise tokens. The above suggests that  
352 the OFC auditory circuitry is inherently more selective to detecting narrowband sounds in  
353 broadband background noise. However, when considering the response of the same unit to a  
354 stimulus token (noise or tone) as the S and as D, we find that out of 109 units, 75(17), 7(48),  
355 8(16) and 19(28) units responded to the tone (noise) both as S and D, only as S, only as D and  
356 neither respectively. The above suggests that responses to the tone was less context sensitive  
357 than noise with more units responding to tones than to noise (75/109 and 17/109,  $p < 0.001$ , *two*  
358 *proportion z-test*) independent of its occurrence as S or D. This further corroborates the fact  
359 that the OFC neurons inherently are more responsive to tones and hence likely narrowband  
360 tonal sounds like mouse vocalizations.

361 In contrast, we found nearly an opposite pattern of context dependence in the AC. Responses  
362 to oddball stimuli pairs (NT and TN) from a total of 62 units (51 in A1, 11 in AuV, 124 cases,  
363 Fig. 3C) were collected from the AC that showed responses to at least one of the 4 stimulus  
364 tokens (as above, Methods). In 22% (28/124) of the cases units responded to both  $S_1$  and D (7  
365 NT and 21 TN, bar plot Fig. 3C, black), while in 48% (60/124) cases units responded to  $S_1$  but  
366 not D (54 NT 6 TN, bar plot in Fig. 3C, magenta). Further, 20% (25/124) responded to only  
367 the D token (none NT and 25 TN, bar plot in Fig. 3C, blue) and the remaining 10% did not  
368 respond to either. As expected from adaptation along frequency channels, when there was a  
369 response to the noise as S very few units showed a response to the tone as deviant (7/61) and  
370 most were unresponsive to the tone (54/61), opposite of what was observed in the OFC.  
371 Considering responses of the same neuron to the tone or noise token in either of the two  
372 contexts (as  $S_1$  or D), 7(45), 20(16), 0(1) and 35(0) out of 62 AC units responded to tone (noise)  
373 as both  $S_1$  and D, only as  $S_1$ , only as D and neither of the two. As above, in the AC, contrary  
374 to observations in the OFC, the tone responses independent of S and D were absent, while noise  
375 responses occurred almost independent of S and D (7/62 and 45/62,  $p < 0.001$ , *two proportion*  
376 *z-test*). There were many more cases in the AC when there were no responses to the tone either  
377 as S or as D. Such units were present in both A1 and AuV in similar proportions (30/51 and  
378 5/11, NS). The choice of tone frequency (Tf) for oddball sets (NT & TN) with respect to the  
379 BF of neurons whose responses were collected, could not explain the difference of context  
380 dependence in the AC and OFC as in both cases the choices were similar (Fig 3D mean(|BF-  
381 Tf|) 1.3 octaves OFC and 1.1 octave AC, NS, *unpaired t-test*).

382 To find the neuron's inherent preference to the deviant either T or N, we calculated CSI in three  
383 different ways based on the choice of S tokens considered for  $S_X$  and  $S_{XS}$  in Equation 2. We  
384 compared the spike rates in response to either the first token of standard ( $S_1$ ) and D, or all  
385 standard tokens ( $S_{ALL}$ ) preceding D except  $S_1$  or just the previous token ( $S_P$ ) to D. Comparison



386 of responses in scatter plots (Fig. 4A) of spikes rates of  $S_1$  and D (left),  $S_{ALL}$  and D (middle)  
387 and  $S_P$  and D (right) for NT and TN (blue and orange respectively) lack of responses to S  
388 beyond  $S_1$ . Further, the different CSI distributions (Fig. 4A, bottom) show that the OFC  
389 neurons respond strongly to  $S_1$  as compared to D probably because  $S_1$  is a bigger change than  
390 D in the stimulus space. The scatter plots of spike rates and CSI indices of  $S_{ALL}$  and D and  $S_P$   
391 and D look very similar suggesting that OFC neurons do not respond to any S except  $S_1$ . We  
392 calculated the CSI of OFC neurons by either taking  $S_{ALL}$  and D or  $S_P$  and D, we found that  
393 these two CSI distributions were not significantly different, whereas in AC these two  
394 distributions were significantly different ( $p < 0.001$ , *t-test*) (Fig. 4B). This clearly shows a strong  
395 adaptation onset right from the second token (beginning of repetition) in OFC unlike ACX  
396 suggesting a hierarchy of SSA strength along this pathway.

397 Since neurons in the OFC did not respond to any of the S tokens following the response to  $S_1$ ,  
398 showing pure deviance detection by responding only to the D token (with  $S_1$  being also  
399 effectively a D from the preceding silence), instead of the 200 (usually)/ 250 ms inter token  
400 interval (IToI), we also considered IToIs of 300 (27 units), 400 (41 units) and 500 ms (40 units).

401 Single neuron raster plots and population mean PSTHs of responses to oddball stimuli (Fig.  
402 4C) showed no responses to any of the sound tokens other than  $S_1$  and D, again showing pure  
403 deviance detection like responses.

404 In order to consider the generality of the pure oddball detection with two narrowband sounds  
405 instead of one narrowband and one broadband, we also collected responses to oddball stimuli  
406 with 2 tones (TT; 102 units) but not necessarily in pairs as in the NT/TN cases. As with TN  
407 and NT cases, there was a lack of responses to the S token beyond  $S_1$  and strong response to  
408 the D tone (Fig. 4D). Comparing the mean DSI (Fig. 4E) between the 3 ways of computing  
409 selectivity index (considering  $S_X$  in Eqn. 3, to be response to  $S_1$ ,  $S_{ALL}$  and  $S_P$ ), as in the case of  
410 NT/TN CSI, showed no significant difference between  $DSI_{ALL}$  and  $DSI_P$  (0.49 and 0.6, NS,

411 ANOVA). In a small subset of units ( $n=25$ ), for which paired data was available with the same  
412 stimulus parameters (repetition rate, position of D) as the TN and NT dataset,  $CSI_{ALL}$  and  $CSI_P$   
413 were also not different (0.23 and 0.26, NS, ANOVA). The comparatively lower CSI value was  
414 due to lack of responses to some of the tones as D in this dataset or higher spontaneous rate,  
415 which also further shows strong adaptation to the S tone. Thus OFC neurons probed with odd  
416 ball stimuli show that they inherently detect changes or violations to the regularity in the  
417 stimulus space and could be an important attribute required for flexible value updating in the  
418 OFC.

419

#### 420 **Sparse responses in the OFC of awake, passively listening mice also show deviance** 421 **detection**

422 In order to confirm that the observed deviance detection in the OFC is also present in neurons  
423 in awake, single unit recordings in passively listening mice were performed with electrodes  
424 implanted in the left OFC (Methods). As in the anesthetized case, we found robust responses  
425 to auditory stimulation, with 73% (162/219) units showing excitatory responses to pure tones  
426 (Fig. 5A&B), which is a much higher proportion of neurons than in an earlier study  
427 (Winkowski et al., 2017). The neurons showed expectedly much shorter latency to peak  
428 ( $134.5 \pm 2.83$  ms SEM, Fig. 5C) than in the anesthetized mice, while a small 14% units showed  
429 a very short latency ( $\sim 14$  ms) and were not included in further analyses as they could be sound  
430 evoked movement related. As in the anesthetized mice, in the awake mice also, a small fraction  
431 of neurons (4%) showed inhibitory responses to tones.

432 In the awake head-fixed passively listening mice, responses to TN and NT pairs of oddball  
433 stimuli were collected from 54 units (108 cases, Fig. 5D and E), which showed responses to at  
434 least one of the four stimuli (two  $S_1$  tokens and two D tokens), as earlier. The population PSTHs  
435 (Fig. 5E) clearly show that neurons responded only to the first token  $S_1$  and then to the D token

436 and not to the other tokens, as was observed in the anesthetized OFC. Thus the basic  
437 observation of immediate adaptation to a single token and response only to deviant token, if at  
438 all, giving rise to deviant selectivity, is the same as in anesthetized mice. However, the  
439 responses in the oddball case were far more selective, sparse and context dependent in the case  
440 of passively listening mice than in anesthetized mice. In 30/108 (28%) cases there were  
441 responses to neither  $S_1$  nor D, which is significantly larger than that in the anesthetized OFC  
442 and AC (34/218,  $p < 0.01$  and 12/124,  $p < 0.001$  respectively, *two proportion z-test*). In 10/108  
443 cases there were responses to both  $S_1$  and D (8 NT and 2 TN), 49/108 cases to only  $S_1$  (36 NT  
444 and 13 TN) and 19/108 cases to only the D token (1 NT and 18 TN, Fig. 5F). Thus overall, in  
445 the awake condition, there were responses to the D token in 27% (29/108) cases compared to  
446 53% cases in the anesthetized OFC (Fig. 3B), showing even higher selectivity of responses.  
447 When considering the same sound tokens as S and D, unlike the anesthetized case we found  
448 far stronger context dependence of responses, particularly to tones. In 1(14), 14(30), 8(6) and  
449 31(4) out of 54 units, there were responses to tones (noise), both as  $S_1$  and D, only as  $S_1$  and  
450 not as D, only as D and not as  $S_1$  and to neither  $S_1$  nor as D, respectively. Thus responses to  
451 tones were far sparser and selective in the oddball stimuli with only 23/54 units showing  
452 responses to the tone (either as  $S_1$  or as D), although for pure tones there were responses in  
453 73% units ( $p < 0.001$ , *two proportion z-test*).

454

455 **OFC receives the major projections from the dorsal AC but the major excitatory drive**  
456 **from the ventral AC**

457 With our observed auditory response properties in the OFC single neurons, and its capability  
458 in modifying auditory cortical responses (Winkowski et al., 2013), it is important to decipher  
459 the sources of auditory inputs to the OFC to understand how such response properties are  
460 derived and how the circuit maybe involved during behavior. While the mouse OFC is being

461 studied extensively in the context of behavior with different sensory stimuli and cues  
462 (Bissonette et al., 2008; Graybeal et al., 2011; Ward et al., 2015; Jennings et al., 2019; Liu et  
463 al., 2019), mouse OFC afferents that can carry auditory information is not clear. In fact,  
464 parallels of prefrontal structure and function between the mouse and the non-human primate  
465 appear to be inconsistent across studies, rodent atlases (Preuss, 1995; Laubach et al., 2018),  
466 although the mouse OFC (and PFC) receives medio-dorsal nucleus (MDN) inputs  
467 (Groenewegen, 1988; Murphy and Deutch, 2018). With the rise in use of mice, due to genetic  
468 and other technical advantages, in frontal cortical research, it becomes important to  
469 characterize the anatomical inputs. In our case, the recording location is the lateral and ventral  
470 OFC (LO/VO) relatively in the rostral part of the OFC extent (Fig. 1A). Although in the rat, an  
471 analogous region is known to receive auditory cortical projections (Murphy and Deutch, 2018),  
472 anatomical and functional details of the sources are not known in the rodent.

473 To find the main source of auditory afferents in the OFC that would be capable of driving  
474 auditory responses, we performed neuroanatomical experiments by injecting 200 nl green  
475 retrobeads (Lumafluor Inc) stereotactically in the OFC. We specifically targeted the location  
476 where we perform electrophysiological recordings ( $n = 9$ , Figs. 1A&6A). Number of beads in  
477 the regions across the rostro-caudal (RC) and medio-lateral (ML) extent encompassing the  
478 ventral AC (AuV), primary AC (A1) and dorsal AC (AuD) were observed and quantified (Fig.  
479 6B, Methods). In a subset of experiments (Methods) we also confirmed the extent of A1 and  
480 AuV with m-cherry labeled projections (Fig. 6C) from the ventral division of the medial  
481 geniculate body (MGBv). Since both AuV and A1 (Fig. 6C) receive MGBv projections (Ohga  
482 et al., 2018), the region dorsal to A1 could be identified as AuD. The regions were demarcated  
483 in other mice (without MGBv labeled projections) based on the mouse atlas (Paxinos and  
484 Franklin, 2013), which corresponded well with our observations in mice with MGBv injections.  
485 Similarly, labeled MGBv projections also allowed us to corroborate lamina specific

486 distribution of cells projecting to the OFC. The average projection profile across the ML extent  
487 of AC showed that AuD had the highest density of cells projecting to the OFC, followed by  
488 AuV, with minimal projections from A1 (Fig. 6D). The lamina specific distributions (Fig. 6E)  
489 showed that most of the projections to OFC from the AC originated in the infra-granular layers  
490 (Layer V/VI). Thus with both A1/AuV and AuD projecting to the OFC, it is likely that both  
491 the lemniscal and nonlemniscal pathways are involved in shaping auditory responses in the  
492 OFC.

493 We next tested the functionality of projections from AC to the OFC, to determine the  
494 contribution of the different regions of AC to the auditory responses in the OFC. In a series of  
495 experiments, single unit recordings with responses to pure tones in the OFC were performed  
496 before and after pharmacological inactivation of AuD ( $n = 3$ ), AuV ( $n = 5$ ) and A1 ( $n = 7$ ) with  
497 muscimol and baclofen (Methods). The site of inactivation was confirmed by tracking  
498 fluorescent SR101 (Fig. 6F-H, left top) mixed with the muscimol-baclofen solution.

499 Contrary to expectation, inactivation of AuD (Fig. 6F), did not affect the single unit OFC  
500 responses to auditory stimulation (Fig. 6F, right, example single unit dot raster). The population  
501 mean PSTHs ( $n = 45$  units) before and after AuD inactivation (Fig. 6F, bottom left), showed  
502 no difference (blue and red, mean spike rates  $72.2 \pm 3.7$  and  $65.7 \pm 4.8$ , NS). All frequencies  
503 responding significantly before inactivation were included in constructing the population  
504 PSTHs. While the AuV, with lesser number of neurons than AuD projecting directly to the  
505 OFC ( $0.11 \pm 0.02$  &  $0.2 \pm 0.03$  beads,  $p < 0.01$  *t-test*; normalized), was found to be the source  
506 of almost the entire auditory driven excitatory activity in the OFC. Similar plots as before, of  
507 example dot raster and population mean PSTHs ( $n = 43$  units) for before and after AuV  
508 inactivation (Fig. 6G) show that OFC auditory responses were almost completely abolished  
509 following AuV block ( $98.7 \pm 3.3$  and  $14.9 \pm 1.4$ ,  $p < 10^{-76}$ ). Of course, other than the direct  
510 inputs to OFC from AuV, other inputs to OFC providing such excitatory auditory inputs cannot

511 be ruled out, but such indirect pathways also must originate from the AuV. Thus the dorsal and  
512 ventral divisions of nonprimary AC are in stark contrast of each other in terms of their  
513 contribution to OFC auditory responses. However, their direct anatomical connections show  
514 characteristics opposite to their functional contributions. Similar to AuD block, inactivation of  
515 A1 (Fig. 6H) did not lead to any change in firing rates ( $70.1 \pm 2.4$  and  $72.9 \pm 3.4$ , NS), as  
516 observed in population mean PSTHs ( $n = 62$  units) and dot raster plots (Fig. 6H). The  
517 possibility of a contralateral A1 contribution through indirect pathways to OFC was also  
518 considered. Bilateral inactivation of A1 (Fig. 6I, top left) also did not change firing rates of  
519 OFC neurons as assessed through population mean PSTHs ( $n = 30$  units) and mean firing rates  
520 of single units in response to tones before and after pharmacological inactivation of both A1s  
521 ( $61.7 \pm 10.07$  and  $79.5 \pm 11.3$ , NS).

522

523 **Auditory responses in the OFC originate from both, the lemniscal and nonlemniscal**  
524 **medial geniculate body (MGB)**

525 Although AuV, alternately A2 (Stiebler et al., 1997), is classically considered a belt area (Kaas  
526 and Hackett, 2000), the presence of lemniscal inputs to AuV (Fig. 6C, Ohga et al., 2018)  
527 opposes the classical view that MGBv projects exclusively to A1/AAF in the core AC. Since  
528 A1 and AuD inactivation did not cause changes in response rates in the OFC and given MGBv  
529 projections on AuV, we hypothesized that OFC auditory responses originate in the lemniscal  
530 MGBv. To test the hypothesis, single unit recordings in response to pure tones in the OFC were  
531 performed before and after MGBv inactivation (Fig. 7A). As with AuV inactivation, auditory  
532 responses in the OFC were completely abolished with MGBv block (23 units,  $121.3 \pm 9.7$  and  
533  $18.5 \pm 1.5$ ,  $p < 10^{-16}$ ). Since MGBv efferents almost entirely project to A1/AAF and AuV, we  
534 conclude that the entire auditory driven excitatory input originates in the lemniscal auditory  
535 thalamus (MGBv). For our MGBv inactivation we confirmed *post hoc* (Fig. 7A top left, inset)

536 the lack of SR101 in dorsal MGB (MGBd) (Paxinos and Franklin, 2013) to rule out inactivation  
537 of the neurons projecting to AuV from there. Physical damage to MGBd during GABA agonist  
538 injections to MGBv was also ruled out by repeating the experiments with saline injections to  
539 MGBv which did not alter tone response rates in the OFC ( $n = 18$  units,  $93 \pm 6$  and  $75.6 \pm 6.6$ ,  
540 NS). Also, since AuD with major thalamic afferents from MGBd (Kok and Lomber, 2017) did  
541 not alter OFC responses, involvement of the nonlemniscal MGBd in OFC auditory responses  
542 are at best minimal. The contribution to OFC auditory responses of the remaining major  
543 nucleus of the auditory thalamus (Calford, 1983; Rouiller et al., 1989; Winer et al., 1999), the  
544 medial MGB (MGBm), was also tested in a similar fashion (Fig. 7B). As opposed to abolition  
545 or no change in response rates observed in the other inactivation experiments, responses to pure  
546 tones altered dramatically in the OFC following inactivation of MGBm. Most units showed a  
547 behavior similar to the example single unit activity before (blue) and after (red) MGBm block  
548 shown in Fig. 7B (right). The population mean PSTHs (42 units) showed no change in peak  
549 response rates ( $54.7 \pm 2.8$  and  $52 \pm 2.8$ , NS, *t-test*) with MGBm inactivation, but the responses  
550 became persistent, with spiking continuing following the stimulus onset sometimes up to 1s  
551 and mean response duration almost doubling ( $177 \pm 6$  and  $314 \pm 11$  ms,  $p < 0.001$ , Fig. 7C).  
552 Thus, MGBm, which has multiple sources of auditory inputs as well as other sensory inputs  
553 and crucially involved in auditory fear conditioning, in the non-lemniscal auditory pathway, is  
554 a source of long lasting auditory driven inhibition in the OFC. The net inhibitory effect in OFC  
555 originating from the MGBm thus sharpens auditory responses. Likewise, when the inhibitory  
556 source in MGBm is itself inhibited, based on behavioral relevance of stimuli (O'Connor et al.,  
557 1997) the effect would be to convert a short duration response into a long lasting persistent  
558 activity, a feature of prefrontal cortical responses in working memory (Fuster and Alexander,  
559 1971; Funahashi et al., 1989; Schoenbaum and Setlow, 2001).

560 Further investigation of the nonlemniscal source (MGBm) of auditory responses in OFC,  
561 requires following up on its broad projections across entire AC, multimodal and limbic cortical  
562 areas (Lee and Winer, 2008; Lee, 2015) through cortical layers 1 and 6 (Huang and Winer,  
563 2000) and the amygdala, specifically the lateral amygdala, LA (Iwata et al., 1986; LeDoux et  
564 al., 1990; Woodson et al., 2000). Given the strong connection from MGBm to LA (Woodson  
565 et al., 2000) and LA to BLA (Ledoux, 2000) and dense projections from BLA to OFC  
566 (Lichtenberg et al., 2017), we hypothesized that the major MGBm contribution to OFC  
567 auditory responses is through the BLA. Barring the possible auditory response contributions in  
568 the OFC of MGBm through AC layer 1 (Huang and Winer, 2000) and AC to LA through BLA,  
569 effects of BLA inactivation would produce an effect similar to that of MGBm silencing. As  
570 expected, on inactivating the BLA (Fig. 7D) we found a similar response pattern with long  
571 lasting persistent activity in the OFC (example dot raster, Fig. 7D, right), with no change in  
572 peak firing rates as assessed through the population mean PSTHs before and after BLA block  
573 (56 units, 68.7+/- 4.6 and 78.9+/-5, NS, *t-test*). As with MGBm block response duration  
574 increased (Fig. 7E) by similar degrees with BLA inactivation (response duration: 156+/-11 and  
575 338+/- 14,  $p < 0.001$ , *t-test*).

576 The changed response to tones after MGBm or BLA inactivation was quantified by considering  
577 the difference in mean rate responses (after-before) to the different frequencies (in the window  
578 of response duration after inactivation, Methods) relative to the BF of the units (Fig. 7F,  
579 MGBm, block left, BLA block, right). In both cases similar pattern of rate difference was  
580 observed, with almost all frequency components relative to BF, showing no significant  
581 difference except a peak at 2 octaves above BF and a negative peak at BF. Thus the MGBm or  
582 BLA based inhibition into the OFC is not organized in a BF specific way. Rather when  
583 considering the changes in firing rate before and after MGBm or BLA inactivation (Fig. 7G,  
584 left and right) in absolute frequency it is found that significant inhibitory inputs are in the



585 middle frequency region of mouse hearing (17-34 kHz). Further we can conclude that there is  
586 a trend of a significant net excitatory contribution mediated through both MGBm and BLA in  
587 the lower frequencies (6-12 kHz). Since the pathway originating in the MGBm is associated  
588 with fear conditioning it is likely that this pathway is already shaped based on the natural  
589 previous experience of fear associated stimuli and auditory events.

590

591 **Auditory response properties and deviant selectivity of OFC: contributions of auditory**  
592 **input sources**

593 Our inactivation experiments of the different divisions of the AC, the MGB and the BLA  
594 conclusively show the sources of the major auditory driven effective excitatory and inhibitory  
595 inputs to the OFC. The conclusions are based on the overall firing rates and duration of  
596 responses to tones. Further analyses of the responses before and after inactivation of A1, AuD,  
597 MGBm and BLA (the cases in which responses were not abolished) show how detailed  
598 temporal aspects of OFC responses, important in population coding based on synchronization  
599 and ultimately in contributing to plasticity and adaptive coding, are derived from the different  
600 sources. Since AuD inactivation did not cause any changes in responses in the OFC, changes  
601 in other aspects of responses were not considered further.

602 We find that, with inactivation of A1, although there are no changes in firing rate, there is a  
603 significant reduction in latency of responses to tones in single units of the OFC ( $306 \pm 3.4$  ms,  
604  $258 \pm 4.33$  ms,  $p < 0.001$ , *paired ttest*, Fig. 8A, left). Such latency reduction is usually  
605 associated with, a stimulus getting effectively stronger (for example with increasing sound  
606 level of noise, Fig. 1B), weaker long term adaptation (Fig. 2E) or a disinhibition. Similarly, on  
607 considering latencies before and after inactivation of MGBm and BLA, opposing effects of  
608 latency were found, although in both cases similar changes were observed in terms of response  
609 rates and response duration. MGBm inactivation led to marked increase in latency to tones

610 (246.5 $\pm$ 4.4, 296.6 $\pm$ 7.3 ms,  $p < .001$ , *paired t-test*, Fig. 8A, middle) while inactivation of BLA  
611 barely led to a reduction in latency (315.4 $\pm$ 7.4, 297.4 $\pm$ 8 ms, NS *t-test*, removing effect of  
612 outliers and comparing medians,  $p < 0.05$  *ranksum*). Since the initial latency of response varied  
613 between the two populations of single units (before MGBm block and before BLA block) we  
614 also compared the fractional change in latency of single units on MGBm inactivation and BLA  
615 inactivation (mean 27% and 7% *unpaired t-test*  $p < 0.001$ ). Thus the effective inhibition in the  
616 OFC, originating from MGBm is not simply relayed by the BLA. It is likely that there are other  
617 auditory sources that also provide inhibition via BLA on to OFC. Such sources of inhibition  
618 on OFC through BLA, likely from AC, (Bertero et al., 2019) remain intact on MGBm  
619 inactivation leading to longer latency, while with BLA inactivation their effect is removed to  
620 lead to the reduced latency. A likely candidate pathway would be A1/AuV to the lateral  
621 amygdala (LA, Romanski and LeDoux, 1993; Romanski et al., 1993; Tsukano et al., 2019),  
622 which in turn projects to the BLA (Janak and Tye, 2015). Further, LA also receives inputs from  
623 MGBm (Ledoux, 2000; Woodson et al., 2000) and is involved in fear conditioning, and thus it  
624 is a critical pathway to provide affective value information associated with particular auditory  
625 stimuli to the OFC.

626 Spike timing is crucial in generating synchronization in populations of neurons (Kreuz et al.,  
627 2007; Ermentrout et al., 2008), plasticity (Benedetti et al., 2009; Li et al., 2014) and in forming  
628 associations (Atilgan et al., 2018). Such temporal aspects of auditory responses are important  
629 in adaptively modifying and transforming sensory stimulus driven responses to behavior  
630 associated responses in the OFC. We first considered spike timing reliability in the OFC single  
631 units before and after inactivation of the different auditory sources. A1 inactivation remarkably  
632 increased spike timing reliability quantified through  $R_{\text{corr}}$  (Methods, from  $0.0953 \pm 0.01$  to  
633  $0.1385 \pm 0.01$ ,  $p < 0.001$ , *paired t-test*, Fig. 8B, left) in response to tones. Again, a differential  
634 effect was observed with BLA and MGBm inactivation. While MGBm inactivation decreased

635 spike timing reliability (from  $0.16 \pm 0.02$ , to  $0.11 \pm 0.01$ ,  $p < 0.01$ , *paired t-test*, Fig. 8B, middle),  
636 BLA inactivation nearly doubled reliability of spike times (from  $0.11 \pm 0.02$ ,  $0.19 \pm 0.02$ ,  
637  $p < 0.001$ , *paired t-test*, Fig. 8B, right) in repeated presentation of tones. Since inhibition is  
638 crucial in precise spike timing (Pouille and Scanziani, 2001; Wehr and Zador, 2003), and with  
639 MGBm having the highest reliability in spiking (Anderson and Linden, 2011) among the  
640 auditory thalamic nuclei, the loss of BLA mediated feedforward inhibition originating from  
641 MGBm, leads to the decreased reliability is spiking in the OFC. However, since A1 acts as a  
642 source of spike timing jitter in the OFC (Fig. 8B, left), blocking of BLA also effectively  
643 removes the effect of A1 dominated spiking jitter introduced in the OFC through LA.  
644 To analyze the contribution of the different auditory sources to response properties of  
645 populations of OFC single units. We considered the case of NT and TN oddball stimuli since  
646 the hallmark of the auditory responses of the OFC is context dependence and deviant detection  
647 (Fig. 8C). Pairwise correlations (Methods) can strengthen coding efficiency (Hung et al., 2015)  
648 and enhance plasticity (Feldman, 2009). Thus, synchronization of responses in pairs of  
649 simultaneously recorded OFC single units was considered before and after inactivation of each  
650 of the auditory sources. Inactivation of A1 produced a small decrease in synchronization with  
651 oddball stimuli (from  $0.67 \pm 0.01$  to  $0.61 \pm 0.02$ ,  $p < 0.05$ , *t-test* Fig. 8D, left). However,  
652 MGBm inactivation caused no change in pairwise correlations ( $0.69 \pm 0.01$  and  $0.69 \pm 0.01$ ,  
653 NS, Fig. 8D, middle) while BLA inactivation reduced pairwise correlations (from  $0.64 \pm 0.02$   
654 to  $0.43 \pm 0.02$ ,  $p < 0.001$  *t-test*, Fig. 8D, right). Thus the effective inhibitory input to the OFC  
655 from the BLA synchronizes activity across populations of single units, independent of the  
656 MGBm input to the BLA. As BLA inactivation increases spike timing reliability of single  
657 neurons, it suggests that auditory driven indirect AC input to the BLA on to OFC, causes  
658 synchronization across pairs of neurons by reducing across trial similarity in responses of single

659 neurons, enhancing a population level representation. The above is further corroborated by the  
660 fact that A1 inactivation reduced pairwise correlations in the OFC, although to a lesser degree.  
661 Finally, we consider the contribution of different auditory sources on the deviant detection  
662 property of OFC single units. Since we did not have sufficient data on pairs of NT and TN both  
663 before and after inactivation of different structures, we considered DSI (Methods) as opposed  
664 to CSI to quantify oddball selectivity. Population mean PSTHs of OFC single units in response  
665 to oddball stimuli before and after inactivation of A1, MGBm and BLA (each row, Fig. 8C)  
666 show emergence of persistent activity at both the onset and the deviant except in the case of  
667 A1 block. Quantification of the selectivity (DSI) before and after block shows that A1 does not  
668 contribute to DSI in the OFC, while inactivation of both the MGBm and the BLA produced  
669 drastic reduction in DSI (from  $0.44 \pm 0.06$  to  $0.46 \pm 0.07$ ,  $p=0.57$ ,  $0.46 \pm 0.05$  to  $-0.34 \pm 0.09$ ,  
670  $p < 0.001$  and  $0.72 \pm 0.04$  to  $0.43 \pm 0.07$ ,  $p < 0.001$  respectively *t-test*, Fig. 8E). The difference  
671 in reduction of DSI in case of MGBm and BLA inactivation, suggest that the primary source  
672 of the selectivity to oddball stimuli in the OFC is the MGBm, while it is further strengthened  
673 by auditory inputs from the BLA from sources other than MGBm (like AC) to the OFC.  
674 However, it should be noted that, with neither MGBm nor BLA inactivation responses to  
675 subsequent tokens after the onset token appeared. So although values of DSI reduce on average  
676 to produce lower oddball selectivity in both cases (MGBm and BLA inactivation), the OFC's  
677 intrinsic selectivity to deviant (onset token also a deviant following silence) and subsequent  
678 fast adaptation over a long time scale is unchanged. AuV is the source of the primary excitatory  
679 input to the OFC and the AuV itself does not show deviant selectivity (Fig. 3C). Thus  
680 adaptation in synapses providing the auditory input and the recurrent synapses within the OFC  
681 along with the membrane properties of OFC neurons themselves likely give rise to the pure  
682 oddball detection responses in the OFC.

683

## 684 **Discussion**

685 We find the presence of robust auditory responses in single units of the mouse OFC during  
686 passive listening both in awake as well as in the anesthetized state. Auditory sensory responses  
687 in the OFC as in AC showed robust responses to tones and noise, the usual characterization  
688 stimuli. Other studies probing the OFC with different kinds of auditory stimuli in the mouse  
689 (Winkowski et al., 2017) and in primates (Rolls et al., 2006) have also found robust responses.  
690 However, in our study we show that the OFC auditory responses were drastically different from  
691 AC responses in a number of major ways, which have not been studied in the OFC previously.  
692 Although AC auditory responses are also affected by multiple time scales of adaptation  
693 (Ulanovsky et al., 2004), OFC neurons showed extremely long history dependence and  
694 adaptation lasting above 10s as observed with comparisons of OFC and A1/AuV responses  
695 with variety of ITIs (Fig.2). This difference was visible when ITI was varied between tone  
696 presentations and shorter ITIs produced higher latencies and lower peak spike rates as  
697 compared to longer ITIs in the OFC. The effects of such adaptation were stronger in the awake  
698 as there were far fewer responses to deviants in TN and NT oddball stimuli. The difference in  
699 history dependence between OFC and AC thus potentially encodes the sensory aspect of the  
700 auditory memory over long timescales. Encoding auditory memory is essential in the OFC as  
701 it is known to play a key role in creating various stimulus-outcome associations (Delamater,  
702 2007; Rudebeck et al., 2008; Sadacca et al., 2018) and their revaluation. Since the outcome of  
703 a stimulus is almost always temporally offset by large durations (Pavlov, 1927; Fuster and  
704 Alexander, 1971) such long history dependence is essential in creating associations between  
705 the two as in auditory trace conditioning (Runyan et al., 2004; Gilmartin and McEchron, 2005).  
706 The OFC neurons show pure deviance detection during oddball stimulus streams, not  
707 responding to any repetition of the standard stimulus except the first one. SSA is present in the  
708 auditory pathway as early as the inferior colliculus, MGB as well as AC (Antunes et al., 2010;

709 Taaseh et al., 2011; Ayala and Malmierca, 2013) where there is a gradual reduction in the spike  
710 rates to the repeating standards due to adaptation but here in the case of OFC we find a complete  
711 and sudden cessation of responses right from the first instant of repetition such that CSI  
712 distribution when computed with  $S_{ALL}$  and  $S_P$  were not significantly different unlike seen in the  
713 AC (Fig. 4). This faster and stronger adaptation to repetition appears to emerge in the OFC  
714 possibly achieved by local circuits within OFC through recurrence (Yarden and Nelken, 2017).  
715 The CSI distribution when computed with  $S_1$  shows a negative mean showing that responses  
716 in the OFC are highest to the biggest change in the stimulus space as the first token of the  
717 standards in the sequence to be the biggest change.

718 The presence of long timescales of adaptation in an anesthetized preparation shows the intrinsic  
719 nature of the OFC neurons. In the awake mouse such temporal dependence is more pronounced  
720 with fewer responses to the oddball stimulus (Fig. 5F). Occurrence of a stimulus from silence  
721 (also a deviant) is sufficient in many cases to suppress responses to a changed stimulus  
722 (oddball) within 2 seconds of the first stimulus token (Fig. 5E&F). However, as evident in our  
723 tuning data in the awake mice, where single tokens of different tones are presented with a gap  
724 of 5s, single units in the OFC respond to a changed stimulus (Fig. 5A). Thus in the awake  
725 condition stimulus changes beyond 2 seconds and within 5 seconds are detectable, thus making  
726 the history dependence more pronounced than in the anesthetized state.

727 The long time scale adaptation or history dependence observed in the OFC has also been  
728 observed to a similar degree in the anesthetized rat MGBm (Antunes et al., 2010), where SSA  
729 is observed in some neurons with up to 2s stimulus onset asynchrony (SOA). However, as  
730 shown by MGBm inactivation, it serves as a source of a long lasting inhibitory drive to the  
731 OFC. Thus, the long time scale dependence observed in the OFC, with suppression of responses  
732 beyond the onset stimulus cannot be derived by the same pathway from the MGBm, as the

733 OFC's main excitatory auditory drive's source is AuV (Fig. 6G) from MGBv (Fig. 7A), which  
734 does not show such remarkable history dependence.

735 In our pharmacological block experiments we found that, while OFC robustly responded to  
736 auditory stimulation, A1 does not contribute to OFC response strength but only induces more  
737 jitter in spike timing and longer response latency possibly via an early inhibition through a  
738 weak input along the A1/AuV-LA-BLA (Romanski et al., 1993; Ledoux, 2000; Tsukano et al.,  
739 2019) or directly from A1 to OFC pathways (Fig. 6D & 6H). Anatomically, we found that  
740 secondary areas of the AC send most of the projections to OFC within AC with AuD showing  
741 the strongest labelling. Despite the strongest labelling, the OFC responses were not affected  
742 upon inactivating AuD. The mouse AuD is more involved in representing perceptual meaning  
743 of primarily temporally structured sounds while AuV is thought to represent value in terms of  
744 novelty (Weible et al., 2014; Geissler et al., 2016). The OFC is involved in stimulus outcome  
745 value computation, which is consistent with the result that AuV drives excitatory auditory  
746 responses in the OFC with basic tone and noise stimuli in the anesthetized state. AuD on the  
747 other hand is likely recruited to provide inputs to the OFC in a more behavioral context specific  
748 manner with complex (vocalizations) or multimodal stimuli (Morrill and Hasenstaub, 2018).  
749 The function and necessity of the AuD projections on to the OFC requires further investigation.  
750 Since OFC responses were abolished on silencing MGBv as with inactivation of AuV which  
751 receives direct inputs from the MGBv (Fig. 7A) (Ohga et al., 2018), we hypothesize that the  
752 OFC auditory responses are driven by MGBv via AuV.

753 Thus, we find that the auditory inputs to the OFC originate in at least two parallel regions in  
754 the MGB, the ventral and medial divisions. These two streams converge in at least two  
755 locations, the amygdala and the OFC. The input from AuV can be hypothesized to carry in  
756 sensory information with context dependence which is sharpened through the long lasting  
757 deviant selective inhibitory drive originating from the MGBm and modified in the BLA and

758 also through local recurrent connections in the OFC. Thus the MGBm and BLA both provide  
759 a saliency filtering of the sensory inputs to the OFC and suppress responses in OFC units  
760 following deviant/salient auditory events. Moreover, control of thalamic deviant detection  
761 response is modulated by attention through the thalamic reticular nucleus (TRN) which can  
762 further modify deviant detection in the OFC (Yu et al., 2009) by sharpening selectivity.  
763 The pathway originating in the MGBm also provides a means of controlling the sensory driven  
764 activity by causing persistent activity in the OFC, if needed, allowing the sensory stimulus to  
765 be associated with other outcome related delayed signals related to reward (Thorpe et al., 1983;  
766 Hikosaka and Watanabe, 2000; Stalnaker et al., 2014), prediction error (O'Neill and Schultz,  
767 2013) or punishment (O'Doherty et al., 2001; Windmann et al., 2006) required for  
768 reinforcement in acquisition as well as in reversal learning. The non-lemniscal MGBm or BLA  
769 inactivation causing the OFC responses to persist for a long duration (up to ~1 sec), could be  
770 further longer in the awake state as we see lack of responses to even the deviant stimulus in the  
771 majority of cases. Such longer persistent activity is common in the PFC in the awake state in  
772 the context of behavior involving working memory (Fuster and Alexander, 1971; Funahashi et  
773 al., 1989; Curtis and D'Esposito, 2003) and also in the OFC conveying incentive value of cues  
774 (Gallagher et al., 1999; Tremblay and Schultz, 1999). However, mechanisms of origins of such  
775 persistent activity are unknown. Thus we hypothesize that the auditory input pathway  
776 originating in the non-lemniscal MGB, provides the behavior related control on the sensory  
777 stimulus through two ways - when active it provides sharpening of deviant detection in the  
778 OFC and when inactive it converts the short stimulus response into persistent activity. In the  
779 latter case, the final input to OFC along this pathway from BLA, causes decorrelation of  
780 response in pairs of OFC units and precise spike timing across trials, other than causing  
781 persistence and lowering of deviant detection. Precisely timed spiking in the persistent OFC  
782 activity would aid in plasticity (Markram et al., 1997; Bi and Poo, 1998; Dan and Poo, 2004;



783 Feldman, 2009) required for associating the auditory stimulus with delayed outcome related  
784 signals. Similarly, decorrelation of activity, removing redundancies in the population, allows  
785 more possibilities of creating associations with the OFC stimulus driven activity and outcome  
786 signals. Frontal cortex is also known to code reward value and other cognitive aspects in spike  
787 times (Smith et al., 2019) and hence the decorrelation and precise spike timing would aid in  
788 forming associations.

789 The above detailed inhibitory control can be achieved by suppression of an auditory stimulus  
790 driven responses in the MGBm or BLA. MGBm has been shown to be the first station in the  
791 auditory pathway that shows changes in the firing rate due to task related stimulus associations  
792 (Birt et al., 1979) and forms part of the thalamo-amygdaloid component in the auditory  
793 pathway (Ledoux et al., 1986) and crucial in fear learning. A study showed presence of a cell  
794 type in the MGBm that silences itself during conditioned stimulus presentation (O'Connor et  
795 al., 1997). MGBm has been shown to initiate a feed forward inhibition in the LA (Woodson et  
796 al., 2000), which through BLA to OFC can cause persistent activity. The MGBm connections  
797 with the limbic-related nuclei in the amygdala can uniquely alter OFC response allowing  
798 affective and emotional aspects of aversive stimuli to be associated with outcomes or changed  
799 outcome signals (LeDoux et al., 1985, 1991; Iwata et al., 1986; Cruikshank et al., 1992). The  
800 LA region receiving MGBm inputs also receive convergent inputs from the A1/AuV  
801 (Romanski et al., 1993; Tsukano et al., 2019), which may allow synchronization and coalescing  
802 sensory responses to salient affective stimuli (Winer, 2006; Weinberger, 2011). Thus the  
803 MGBm driven control of OFC activity is likely to do with associations of fear eliciting stimuli  
804 (Weinberger et al., 1995; Weinberger, 2011). It is also reflected in the fact that the frequency  
805 profile of the inhibitory inputs from the MGBm via the LA-BLA-OFC pathway is innately  
806 tuned to the 30 kHz region (Fig. 7) which is also the frequency range of fear induced  
807 vocalizations.

808 Similarly the BLA, known to encode valence (Paton et al., 2006; Janak and Tye, 2015; Zhang  
809 and Li, 2018), to OFC connections have been shown to be important in a number of ways in  
810 disruption of decision making and reversal learning (Zeeb and Winstanley, 2013; Orsini et al.,  
811 2015; Lichtenberg et al., 2017; Groman et al., 2019). Particularly BLA projections to the OFC  
812 are known to enable stimulus cue triggered reward expectations and ablation of BLA neurons  
813 projecting to the OFC impairs reversal learning due to inability to use positive outcomes guided  
814 choices following reversal. We hypothesize that the underlying deviant selectivity of auditory  
815 inputs imposed by the amygdala and lack of precise disinhibitory control to generate persistent  
816 activity to associate with the newly rewarding or positive outcomes in the OFC after  
817 contingency reversal leads to observed dysfunctions stated above. Thus we propose that the  
818 MGBm via LA-BLA and BLA itself act as controllers of persistent activity required for  
819 stimulus and delayed outcome associations during reversal learning, for aversive and rewarding  
820 cues respectively.

821

## 822 **References**

- 823 Anderson LA, Linden JF (2011) Physiological differences between histologically defined subdivisions in  
824 the mouse auditory thalamus. *Hear Res* 274:48–60.
- 825 Antunes FM, Nelken I, Covey E, Malmierca MS (2010) Stimulus-Specific Adaptation in the Auditory  
826 Thalamus of the Anesthetized Rat Yan J, ed. *PLoS One* 5:e14071.
- 827 Atilgan H, Town SM, Wood KC, Jones GP, Maddox RK, Lee AKC, Bizley JK (2018) Integration of Visual  
828 Information in Auditory Cortex Promotes Auditory Scene Analysis through Multisensory Binding.  
829 *Neuron* 97:640-655.e4.
- 830 Ayala YA, Malmierca MS (2013) Stimulus-specific adaptation and deviance detection in the inferior  
831 colliculus. *Front Neural Circuits* 6:89.
- 832 Benedetti BL, Glazewski S, Barth AL (2009) Reliable and precise neuronal firing during sensory plasticity  
833 in superficial layers of primary somatosensory cortex. *J Neurosci* 29:11817–11827.

- 834 Bertero A, Feyen PLC, Zurita H, Apicella AJ (2019) A Non-Canonical Cortico-Amygdala Inhibitory Loop.  
835 J Neurosci 39:8424–8438.
- 836 Bi GQ, Poo MM (1998) Synaptic modifications in cultured hippocampal neurons: Dependence on spike  
837 timing, synaptic strength, and postsynaptic cell type. J Neurosci 18:10464–10472.
- 838 Birt D, Nienhuis R, Olds M (1979) Separation of associative from non-associative short latency changes  
839 in medial geniculate and inferior colliculus during differential conditioning and reversal in rats.  
840 Brain Res 167:129–138.
- 841 Bissonette GB, Martins GJ, Franz TM, Harper ES, Schoenbaum G, Powell EM (2008) Double dissociation  
842 of the effects of medial and orbital prefrontal cortical lesions on attentional and affective shifts  
843 in mice. J Neurosci 28:11124–11130.
- 844 Calford MB (1983) The parcellation of the medial geniculate body of the cat defined by the auditory  
845 response properties of single units. J Neurosci 3:2350–2364.
- 846 Chen I-W, Helmchen F, Lütcke H (2015) Specific Early and Late Oddball-Evoked Responses in Excitatory  
847 and Inhibitory Neurons of Mouse Auditory Cortex.
- 848 Cruikshank SJ, Edeline J-M, Weinberger NM (1992) Stimulation at a site of auditory-somatosensory  
849 convergence in the medial geniculate nucleus is an effective unconditioned stimulus for fear  
850 conditioning. Behav Neurosci 106:471–483.
- 851 Curtis CE, D’Esposito M (2003) Persistent activity in the prefrontal cortex during working memory.  
852 Trends Cogn Sci 7:415–423.
- 853 Dan Y, Poo MM (2004) Spike timing-dependent plasticity of neural circuits. Neuron 44:23–30.
- 854 Delamater AR (2007) The role of the orbitofrontal cortex in sensory-specific encoding of associations  
855 in Pavlovian and instrumental conditioning. In: Annals of the New York Academy of Sciences, pp  
856 152–173. Blackwell Publishing Inc.
- 857 Dilgen J, Tejada HA, O’Donnell P (2013) Amygdala inputs drive feedforward inhibition in the medial  
858 prefrontal cortex. J Neurophysiol 110:221–229.
- 859 Ermentrout GB, Galán RF, Urban NN (2008) Reliability, synchrony and noise. Trends Neurosci 31:428–

860 434.

861 Feldman DE (2009) Synaptic Mechanisms for Plasticity in Neocortex. *Annu Rev Neurosci* 32:33–55.

862 Fresno V, Parkes SL, Faugère AL, Coutureau E, Wolff M (2019) A thalamocortical circuit for updating  
863 action-outcome associations. *Elife* 8.

864 Fritz JB, David S V, Radtke-Schuller S, Yin P, Shamma SA (2010) Adaptive, behaviorally gated, persistent  
865 encoding of task-relevant auditory information in ferret frontal cortex. *Nat Neurosci* 13:1011–  
866 1019.

867 Funahashi S, Bruce CJ, Goldman-Rakic PS (1989) Mnemonic coding of visual space in the monkey’s  
868 dorsolateral prefrontal cortex. *J Neurophysiol* 61:331–349.

869 Fuster JM, Alexander GE (1971) Neuron activity related to short-term memory. *Science* (80- ) 173:652–  
870 654.

871 Gallagher M, McMahan RW, Schoenbaum G (1999) Orbitofrontal cortex and representation of  
872 incentive value in associative learning. *J Neurosci* 19:6610–6614.

873 Geissler DB, Schmidt HS, Ehret G (2016) Knowledge about sounds-context-specific meaning differently  
874 activates cortical hemispheres, auditory cortical fields, and layers in house mice. *Front Neurosci*  
875 10.

876 Gilmartin MR, McEchron MD (2005) Single neurons in the medial prefrontal cortex of the rat exhibit  
877 tonic and phasic coding during trace fear conditioning. *Behav Neurosci* 119:1496–1510.

878 Graybeal C, Feyder M, Schulman E, Saksida LM, Bussey TJ, Brigman JL, Holmes A (2011) Paradoxical  
879 reversal learning enhancement by stress or prefrontal cortical damage: Rescue with BDNF. *Nat*  
880 *Neurosci* 14:1507–1509.

881 Groenewegen HJ (1988) Organization of the afferent connections of the mediodorsal thalamic nucleus  
882 in the rat, related to the mediodorsal-prefrontal topography. *Neuroscience* 24:379–431.

883 Groman SM, Keistler C, Keip AJ, Hammarlund E, DiLeone RJ, Pittenger C, Lee D, Taylor JR (2019)  
884 Orbitofrontal Circuits Control Multiple Reinforcement-Learning Processes. *Neuron* 103:734-  
885 746.e3.

- 886 Hikosaka K, Watanabe M (2000) Delay Activity of Orbital and Lateral Prefrontal Neurons of the Monkey  
887 Varying with Different Rewards. *Cereb Cortex* 10:263–271.
- 888 Huang CL, Winer JA (2000) Auditory thalamocortical projections in the cat: Laminar and areal patterns  
889 of input. *J Comp Neurol* 427:302–331.
- 890 Hung CP, Cui D, Chen YP, Lin CP, Levine MR (2015) Correlated activity supports efficient cortical  
891 processing. *Front Comput Neurosci* 8.
- 892 Iwata J, LeDoux JE, Meeley MP, Arneric S, Reis DJ (1986) Intrinsic neurons in the amygdaloid field  
893 projected to by the medial geniculate body mediate emotional responses conditioned to acoustic  
894 stimuli. *Brain Res* 383:195–214.
- 895 Janak PH, Tye KM (2015) From circuits to behaviour in the amygdala. *Nature* 517:284–292.
- 896 Jennings JH, Kim CK, Marshel JH, Raffiee M, Ye L, Quirin S, Pak S, Ramakrishnan C, Deisseroth K (2019)  
897 Interacting neural ensembles in orbitofrontal cortex for social and feeding behaviour. *Nature*  
898 565:645–649.
- 899 Kaas JH, Hackett TA (2000) Subdivisions of auditory cortex and processing streams in primates. *Proc*  
900 *Natl Acad Sci U S A* 97:11793–11799.
- 901 Kok MA, Lomber SG (2017) Origin of the thalamic projection to dorsal auditory cortex in hearing and  
902 deafness. *Hear Res* 343:108–117.
- 903 Kreuz T, Haas JS, Morelli A, Abarbanel HDI, Politi A (2007) Measuring spike train synchrony. *J Neurosci*  
904 *Methods* 165:151–161.
- 905 Laubach M, Amarante LM, Swanson K, White SR (2018) What, if anything, is rodent prefrontal cortex?  
906 *eNeuro* 5.
- 907 LeDoux JE (2000) *Emotion circuits in the brain*. New York:155–184.
- 908 LeDoux JE, Farb C, Ruggiero DA (1990) Topographic organization of neurons in the acoustic thalamus  
909 that project to the amygdala. *J Neurosci* 10:1043–1054.
- 910 LeDoux JE, Farb CR, Romanski LM (1991) Overlapping projections to the amygdala and striatum from  
911 auditory processing areas of the thalamus and cortex. *Neurosci Lett* 134:139–144.

- 912 LeDoux JE, Ruggiero DA, Reis DJ (1985) Projections to the subcortical forebrain from anatomically  
913 defined regions of the medial geniculate body in the rat. *J Comp Neurol* 242:182–213.
- 914 Ledoux JE, Sakaguchi A, Iwata J, Reis DJ (1986) Interruption of projections from the medial geniculate  
915 body to an archi-neostriatal field disrupts the classical conditioning of emotional responses to  
916 acoustic stimuli. *Neuroscience* 17:615–627.
- 917 Lee CC (2015) Exploring functions for the non-lemniscal auditory thalamus. *Front Neural Circuits* 9:69.
- 918 Lee CC, Winer JA (2008) Connections of cat auditory cortex: I. Thalamocortical system. *J Comp Neurol*  
919 507:1879–1900.
- 920 Lee D, Seo H, Jung MW (2012) Neural Basis of Reinforcement Learning and Decision Making. *Annu Rev*  
921 *Neurosci* 35:287–308.
- 922 Li XY, Wang N, Wang YJ, Zuo ZX, Koga K, Luo F, Zhuo M (2014) Long-term temporal imprecision of  
923 information coding in the anterior cingulate cortex of mice with peripheral inflammation or  
924 nerve injury. *J Neurosci* 34:10675–10687.
- 925 Lichtenberg NT, Pennington ZT, Holley SM, Greenfield VY, Cepeda X, Levine MS, Wassum KM (2017)  
926 Basolateral Amygdala to Orbitofrontal Cortex Projections Enable Cue-Triggered Reward  
927 Expectations.
- 928 Liu D, Deng J, Zhang Z, Zhang Z-Y, Sun Y-G, Yang T, Yao H (2019) Orbitofrontal control of visual cortex  
929 gain promotes visual associative learning. *bioRxiv*:794958.
- 930 Luna VM, Morozov A (2012) Input-specific excitation of olfactory cortex microcircuits. *Front Neural*  
931 *Circuits* 6:1–7.
- 932 Markram H, Lübke J, Frotscher M, Sakmann B (1997) Regulation of synaptic efficacy by coincidence of  
933 postsynaptic APs and EPSPs. *Science* (80- ) 275:213–215.
- 934 McGarry LM, Carter AG (2016) Inhibitory gating of basolateral Amygdala inputs to the prefrontal  
935 cortex. *J Neurosci* 36:9391–9406.
- 936 Miller EK, Cohen JD (2001) An Integrative Theory of Prefrontal Cortex Function. *Annu Rev Neurosci*  
937 24:167–202.

- 938 Morrill RJ, Hasenstaub AR (2018) Visual information present in infragranular layers of mouse auditory  
939 cortex. *J Neurosci* 38:2854–2862.
- 940 Morrison SE, Salzman CD (2011) Representations of appetitive and aversive information in the primate  
941 orbitofrontal cortex. *Ann N Y Acad Sci* 1239:59–70.
- 942 Murphy MJM, Deutch AY (2018) Organization of afferents to the orbitofrontal cortex in the rat. *J Comp*  
943 *Neurol.*
- 944 Nieto-Diego J, Malmierca MS (2016) Topographic Distribution of Stimulus-Specific Adaptation across  
945 Auditory Cortical Fields in the Anesthetized Rat. *PLoS Biol.*
- 946 O’Connor KN, Allison TL, Rosenfield ME, Moore JW (1997) Neural activity in the medial geniculate  
947 nucleus during auditory trace conditioning. *Exp Brain Res* 113:534–556.
- 948 O’Doherty J, Kringelbach ML, Rolls ET, Hornak J, Andrews C (2001) Abstract reward and punishment  
949 representations in the human orbitofrontal cortex. *Nat Neurosci* 4:95–102.
- 950 O’Neill M, Schultz W (2013) Risk prediction error coding in orbitofrontal neurons. *J Neurosci* 33:15810–  
951 15814.
- 952 Ohga S, Tsukano H, Horie M, Terashima H, Nishio N, Kubota Y, Takahashi K, Hishida R, Takebayashi H,  
953 Shibuki K (2018) Direct Relay Pathways from Lemniscal Auditory Thalamus to Secondary Auditory  
954 Field in Mice. *Cereb Cortex.*
- 955 Orsini CA, Trotta RT, Bizon JL, Setlow B (2015) Dissociable roles for the basolateral amygdala and  
956 orbitofrontal cortex in decision-making under risk of punishment. *J Neurosci* 35:1368–1379.
- 957 Ostlund SB, Balleine BW (2007) Orbitofrontal cortex mediates outcome encoding in pavlovian but not  
958 instrumental conditioning. *J Neurosci* 27:4819–4825.
- 959 Paton JJ, Belova MA, Morrison SE, Salzman CD (2006) The primate amygdala represents the positive  
960 and negative value of visual stimuli during learning. *Nature* 439:865–870.
- 961 Pavlov IP (1927) Conditioned reflexes: an investigation of the physiological activity of the cerebral  
962 cortex. - PsycNET. Oxford UP Available at: <https://psycnet.apa.org/record/1927-02531-000>
- 963 Paxinos G, Franklin KBJ (2013) Paxinos and Franklin’s The mouse brain in stereotaxic coordinates.

- 964 Pouille F, Scanziani M (2001) Enforcement of temporal fidelity in pyramidal cells by somatic feed-  
965 forward inhibition. *Science* (80- ) 293:1159–1163.
- 966 Preuss TM (1995) Do rats have prefrontal cortex? The Rose-Woolsey-Akert program reconsidered. *J*  
967 *Cogn Neurosci* 7:1–24.
- 968 Rolls ET, Critchley HD, Browning AS, Inoue K (2006) Face-selective and auditory neurons in the primate  
969 orbitofrontal cortex. *Exp Brain Res* 170:74–87.
- 970 Romanski LM, Clugnet MC, Bordi F, LeDoux JE (1993) Somatosensory and Auditory Convergence in the  
971 Lateral Nucleus of the Amygdala. *Behav Neurosci* 107:444–450.
- 972 Romanski LM, LeDoux JE (1993) Information Cascade from Primary Auditory Cortex to the Amygdala:  
973 Corticocortical and Corticoamygdaloid Projections of Temporal Cortex in the Rat. *Cereb Cortex*  
974 3:515–532.
- 975 Rouiller EM, Rodrigues-Dageaef C, Simm G, De Ribaupierre Y, Villa A, De Ribaupierre F (1989)  
976 Functional organization of the medial division of the medial geniculate body of the cat: Tonotopic  
977 organization, spatial distribution of response properties and cortical connections. *Hear Res*  
978 39:127–142.
- 979 Rudebeck PH, Behrens TE, Kennerley SW, Baxter MG, Buckley MJ, Walton ME, Rushworth MFS (2008)  
980 Frontal cortex subregions play distinct roles in choices between actions and stimuli. *J Neurosci*  
981 28:13775–13785.
- 982 Runyan JD, Moore AN, Dash PK (2004) A Role for Prefrontal Cortex in Memory Storage for Trace Fear  
983 Conditioning. *J Neurosci* 24:1288–1295.
- 984 Sacco T, Sacchetti B (2010) Role of secondary sensory cortices in emotional memory storage and  
985 retrieval in rats. *Science* (80- ) 329:649–656.
- 986 Sadacca BF, Wied HM, Lopatina N, Saini GK, Nemirovsky D, Schoenbaum G (2018) Orbitofrontal  
987 neurons signal sensory associations underlying model-based inference in a sensory  
988 preconditioning task. *Elife* 7.
- 989 Sawatari H, Tanaka Y, Takemoto M, Nishimura M, Hasegawa K, Saitoh K, Song W-J (2011) Identification



- 990 and characterization of an insular auditory field in mice. *Eur J Neurosci* 34:1944–1952.
- 991 Schoenbaum G, Roesch M (2005) Orbitofrontal cortex, associative learning, and expectancies. *Neuron*  
992 47:633–636.
- 993 Schoenbaum G, Setlow B (2001) Integrating orbitofrontal cortex into prefrontal theory: Common  
994 processing themes across species and subdivisions. *Learn Mem* 8:134–147.
- 995 Schreiber S, Fellous JM, Whitmer D, Tiesinga P, Sejnowski TJ (2003) A new correlation-based measure  
996 of spike timing reliability. *Neurocomputing*.
- 997 Slater BJ, Sons SK, Yudintsev G, Lee CM, Llano DA (2019) Thalamocortical and intracortical inputs  
998 differentiate layer-specific mouse auditory corticocollicular neurons. *J Neurosci* 39:256–270.
- 999 Smith EH, Horga G, Yates MJ, Mikell CB, Banks GP, Pathak YJ, Schevon CA, McKhann GM, Hayden BY,  
1000 Botvinick MM, Sheth SA (2019) Widespread temporal coding of cognitive control in the human  
1001 prefrontal cortex. *Nat Neurosci* 22:1883–1891.
- 1002 Stalnaker TA, Cooch NK, McDannald MA, Liu T-L, Wied H, Schoenbaum G (2014) Orbitofrontal neurons  
1003 infer the value and identity of predicted outcomes. *Nat Commun* 5:3926.
- 1004 Stiebler I, Neulist R, Fichtel I, Ehret G (1997) The auditory cortex of the house mouse: Left-right  
1005 differences, tonotopic organization and quantitative analysis of frequency representation. *J*  
1006 *Comp Physiol - A Sensory, Neural, Behav Physiol* 181:559–571.
- 1007 Taaseh N, Yaron A, Nelken I (2011) Stimulus-Specific Adaptation and Deviance Detection in the Rat  
1008 Auditory Cortex Sugihara I, ed. *PLoS One* 6:e23369.
- 1009 Thorpe SJ, Rolls ET, Maddison S (1983) The orbitofrontal cortex: Neuronal activity in the behaving  
1010 monkey. *Exp Brain Res* 49:93–115.
- 1011 Tremblay L, Schultz W (1999) Relative reward preference in primate orbitofrontal cortex. *Nature*  
1012 398:704–708.
- 1013 Tsukano H, Hou X, Horie M, Kitaura H, Nishio N, Hishida R, Takahashi K, Kakita A, Takebayashi H,  
1014 Sugiyama S, Shibuki K (2019) Reciprocal connectivity between secondary auditory cortical field  
1015 and amygdala in mice. *Sci Rep* 9:19610.

- 1016 Ulanovsky N, Las L, Farkas D, Nelken I (2004) Multiple time scales of adaptation in auditory cortex  
1017 neurons. *J Neurosci* 24:10440–10453.
- 1018 Ulanovsky N, Las L, Nelken I (2003) Processing of low-probability sounds by cortical neurons. *Nat*  
1019 *Neurosci* 6:391–398.
- 1020 Wallis JD (2007) Orbitofrontal Cortex and Its Contribution to Decision-Making. *Annu Rev Neurosci*  
1021 30:31–56.
- 1022 Ward RD, Winiger V, Kandel ER, Balsam PD, Simpson EH (2015) Orbitofrontal cortex mediates the  
1023 differential impact of signaled-reward probability on discrimination accuracy. *Front Neurosci* 9.
- 1024 Wehr M, Zador AM (2003) Balanced inhibition underlies tuning and sharpens spike timing in auditory  
1025 cortex. *Nature* 426:442–446.
- 1026 Weible AP, Liu C, Niell CM, Wehr M (2014) Auditory Cortex Is Required for Fear Potentiation of Gap  
1027 Detection.
- 1028 Weinberger NM (2011) The medial geniculate, not the amygdala, as the root of auditory fear  
1029 conditioning. *Hear Res* 274:61–74.
- 1030 Weinberger NM, Javid R, Lapan B (1995) Heterosynaptic long-term facilitation of sensory-evoked  
1031 responses in the auditory cortex by stimulation of the magnocellular medial geniculate body in  
1032 guinea pigs. *Behav Neurosci* 109:10–17.
- 1033 Wilson RC, Takahashi YK, Schoenbaum G, Niv Y (2014) Orbitofrontal cortex as a cognitive map of task  
1034 space. *Neuron* 81:267–279.
- 1035 Windmann S, Kirsch P, Mier D, Stark R, Walter B, Güntürkün O, Vaitl D (2006) On framing effects in  
1036 decision making: Linking lateral versus medial orbitofrontal cortex activation to choice outcome  
1037 processing. *J Cogn Neurosci* 18:1198–1211.
- 1038 Winer JA (2006) Decoding the auditory corticofugal systems. *Hear Res* 212:1–8.
- 1039 Winer JA, Kelly JB, Larue DT (1999) Neural architecture of the rat medial geniculate body. *Hear Res*  
1040 130:19–41.
- 1041 Winkowski DE, Bandyopadhyay S, Shamma SA, Kanold PO (2013) Frontal Cortex Activation Causes

1042 Rapid Plasticity of Auditory Cortical Processing.

1043 Winkowski DE, Nagode DA, Donaldson KJ, Yin P, Shamma SA, Fritz JB, Kanold PO (2017) Orbitofrontal  
1044 Cortex Neurons Respond to Sound and Activate Primary Auditory Cortex Neurons. *Cereb Cortex*.

1045 Woodson W, Farb CR, Ledoux JE (2000) Afferents from the auditory thalamus synapse on inhibitory  
1046 interneurons in the lateral nucleus of the amygdala. *Synapse* 38:124–137.

1047 Yarden TS, Nelken I (2017) Stimulus-specific adaptation in a recurrent network model of primary  
1048 auditory cortex. *PLoS Comput Biol*.

1049 Yu XJ, Xu XX, He S, He J (2009) Change detection by thalamic reticular neurons. *Nat Neurosci* 12:1165–  
1050 1170.

1051 Zeeb FD, Winstanley CA (2013) Functional disconnection of the orbitofrontal cortex and basolateral  
1052 amygdala impairs acquisition of a rat gambling task and disrupts animals' ability to alter decision-  
1053 making behavior after reinforcer devaluation. *J Neurosci* 33:6434–6443.

1054 Zhang X, Li B (2018) Population coding of valence in the basolateral amygdala. *Nat Commun* 9.

## 1055 **Figure Legends**

1056

### 1057 **Figure 1 – OFC responds to auditory stimulation.**

1058 (A) Nissl stain of OFC section showing electrode tracks. Black arrows mark the medio-lateral  
1059 extent of the electrode array. (B) an example unit showing responses to increasing intensities  
1060 of broadband noise in raster plot (left) and rate-level curve (right). (Ci-iii) Tuning curves of  
1061 three example units tuned to low (Ci), mid (Cii) and high (Ciii) frequencies. (Civ) Distribution  
1062 of units tuned to different frequencies. (Cv) An example unit with bimodal tuning curve. (Cvi)  
1063 An example unit with broad tuning curve (D) top: mean normalized PSTH  $\pm$  SEM of all units  
1064 showing excitation (black) and inhibition (grey) upon auditory stimulation. Bottom; individual  
1065 unit's PSTH (upper panel: units showing excitation, middle two panels: units showing  
1066 excitation to some frequency and inhibition to some other frequency, lower panel: units  
1067 showing inhibition). (E) distribution of peak response latency to the BF. (F) Spatial BF

1068 variability. Black arrow marks the median of the distribution and grey arrow marks the median  
1069 of the distribution of completely random BF organization.

1070

### 1071 **Figure 2 – OFC neurons show long timescales of adaptation**

1072 (A) Psth of two example units in the OFC at different ITIs (black; less than 5 secs (short),  
1073 magenta; between 5 and 7 secs (mid), blue; more than 7 secs up to 11 secs (long)). (B) Similar  
1074 to (A) in the AC (C) mean population PSTH  $\pm$  SEM at different ITIs in the OFC (D) Mean  
1075 peak spike rate in the OFC (E) mean peak response latency in the OFC (F) mean population  
1076 PSTH  $\pm$  SEM at different ITIs in the AC (G) mean peak spike rate in the AC (H) mean peak  
1077 response latency in the AC

1078

### 1079 **Figure 3 – Pure Deviant Detection in OFC unlike AC (i)**

1080 (A) An example unit showing auditory response (raster (black) and PSTH (red) to an odd-ball  
1081 stimulus where noise is played as standard and tone as deviant (NT; left) and its swap (TN;  
1082 right). The vertical lines mark the onset of standard and deviant (grey for noise and black for  
1083 tone). (B) (left) Mean population PSTH  $\pm$  SEM of units responding to both standard onset and  
1084 deviant (S=1, D=1; black), responding only to standard onset (S=1, D=0; magenta) and  
1085 responding only to deviant (S=0, D=1; blue). Right: Fraction of units belonging to different  
1086 categories as described in (B). The darker shades show the fraction of units belonging to NT  
1087 and lighter shades show fraction of units belonging to TN group. (C) Similar to (B) in the AC.  
1088 (D) mean ( $|BF-Tf|$ ) in the NT-TN oddball stimuli in the OFC and AC

1089

### 1090 **Figure 4 – Pure Deviant Detection in OFC unlike AC (ii)**

1091 (A) Top: Scatter plot of mean spike rate at standard and deviant in NT (blue) and TN (orange).  
1092 The spike rates for standard were calculated either considering the  $S_1$  (left), or  $S_{ALL}$  (middle)

1093 or  $S_{PT}$  (right). The tokens considered in the two cases are enclosed in the grey rectangle. The  
1094 histograms at the bottom show the CSIs computed by using three different standards as  
1095 described in (A). (B) Scatter plot of CSIs in OFC (top) and AC (bottom) calculated by taking  
1096  $S_{ALL}$  and  $S_{PT}$ . The mean CSIs in the two cases are shown in the bar plots in the inset. (C) Top:  
1097 Raster plots of example units in response to odd-ball stimulus with different inter-token  
1098 interval; 300 ms (left), 400 ms (middle) and 500 ms (right). Bottom: mean population PSTH  
1099 for these intervals. (D) Mean population PSTH to tone-tone odd-ball stimulus. (E) Mean DSI  
1100 for tone-tone odd-ball stimulus with three different standards as described in (A).

1101

### 1102 **Figure 5 – Awake mouse OFC also shows deviance detection**

1103 (A) Raster plot of an example unit in the OFC showing responses to tones of different  
1104 frequencies in awake condition. (B) Top: mean normalized PSTH  $\pm$  SEM of all units showing  
1105 excitation (black) and inhibition (grey) upon auditory stimulation. Bottom: individual unit's  
1106 PSTH (upper panel: units showing excitation, middle two panels: units showing excitation to  
1107 some frequency and inhibition to some other frequency, lower panel: units showing inhibition)  
1108 (C) A distribution of peak response latency in the awake condition. (D) Raster plot (black) and  
1109 PSTH (red) of an example unit showing responses to odd ball stimulus. (E) Mean population  
1110 PSTH  $\pm$  SEM of units responding to both standard onset and deviant ( $S=1$ ,  $D=1$ ; black),  
1111 responding only to standard onset ( $S=1$ ,  $D=0$ ; magenta) and responding only to deviant ( $S=0$ ,  
1112  $D=1$ ; blue). (F) Fraction of units belonging to different categories as described in (E). The  
1113 darker shades show the fraction of units belonging to NT and lighter shades show fraction of  
1114 units belonging to TN group.

1115

1116

1117

1118 **Figure 6 – Distinct contributions of AC divisions in OFC auditory responses**

1119 (A) Top: Coronal brain section showing retrobeads injection site (white arrow) in the OFC.  
1120 Bottom: Injection sites in all 9 animals (B) Top left: coronal brain section from mouse atlas  
1121 showing auditory cortex. Magenta box roughly marks the part of the brain region shown in  
1122 bottom left image. Bottom left: regions of AuD and AuV are marked in the yellow box. rf:  
1123 rhinal fissure. Middle: AuD (top) and AuV (bottom) showing labeled cell bodies (white arrows)  
1124 by the retrograde transported beads from OFC. Right: Same regions with enhanced intensities  
1125 of the blue pixels for easy visualization of the beads. (C) Left: Brain section showing layer 4  
1126 of the AC labelled with AAV-mcherry injected in the MGBv. Right; zoomed in image of the  
1127 area inside the yellow box on the left showing beads. (D) Mean number of beads as a function  
1128 of distance from the rf. Dashed red lines mark the extent of A1 (E) Laminar distribution of  
1129 beads in the AC (F) Brain section showing block site in the AuD; Raster plots of an example  
1130 unit before and after silencing the AuD; mean population PSTH  $\pm$  SEM before (blue) and after  
1131 (red) silencing the AuD. Vertical grey line is the stimulus time. (G) Brain section showing  
1132 block site in the AuV; Raster plots of an example unit before and after silencing the AuV; mean  
1133 population PSTH  $\pm$  SEM before (blue) and after (red) silencing the AuV. (H) Brain section  
1134 showing block site in the A1; Raster plots of an example unit before and after silencing the A1;  
1135 mean population PSTH  $\pm$  SEM before (blue) and after (red) silencing the A1. (I) Brain section  
1136 showing dual block sites in both A1; Raster plots of an example unit before and after silencing  
1137 both the A1s; mean population PSTH  $\pm$  SEM before (blue) and after (red) silencing both the  
1138 A1s. (J) Block sites in the AuD, AuV and A1 from the rf.

1139

1140 **Figure 7 – Parallel excitatory and inhibitory contributions to OFC auditory responses**  
1141 **originate in the lemniscal and non-lemniscal auditory thalamic nuclei**

1142 (A) Brain section showing block site in the MGBv; Raster plots of an example unit before and  
1143 after silencing the MGBv; mean population PSTH  $\pm$  SEM before (blue) and after (red) silencing  
1144 MGBv. Vertical grey line is the stimulus time. (B) Brain section showing block site in the  
1145 MGBm; Raster plots of an example unit before and after silencing the MGBm; mean  
1146 population PSTH  $\pm$  SEM before (blue) and after (red) silencing the MGBm. (C) Mean response  
1147 duration before and after silencing the MGBm (D) Brain section showing block site in the  
1148 BLA; Raster plots of an example unit before and after silencing the BLA; mean population  
1149 PSTH  $\pm$  SEM before (blue) and after (red) silencing the BLA. (E) Mean response duration  
1150 before and after silencing the BLA. Mean inhibitory inputs into OFC, from MGBm and BLA  
1151 as a function of (F) frequency with respect to BF and (G) absolute frequency.

1152

1153 **Figure 8 – Both OFC deviant selectivity and spike time based response properties are**  
1154 **shaped by the nonlemniscal pathway unlike by A1**

1155 (A) Mean population latency  $\pm$  sem to pure tones before (black) and after (magenta) silencing  
1156 A1 (left), MGBm (middle) and BLA (right). (B) Mean population reliability ( $R_{\text{corr}}$ )  $\pm$  SEM  
1157 before (black) and after (magenta) silencing A1 (left), MGBm (middle) and BLA (right). (C)  
1158 Mean population PSTH  $\pm$  SEM in response to odd ball stimulus before (black) and after  
1159 (magenta) silencing A1 (top), MGBm (middle) and BLA (bottom). (D) Mean population  
1160 pairwise correlations  $\pm$  SEM before (black) and after (magenta) silencing A1 (left), MGBm  
1161 (middle) and BLA (right). (E) Mean population DSI  $\pm$  SEM before (black) and after (magenta)  
1162 silencing A1 (left), MGBm (middle) and BLA (right).

1163

1164

1165 **FIGURE 1**

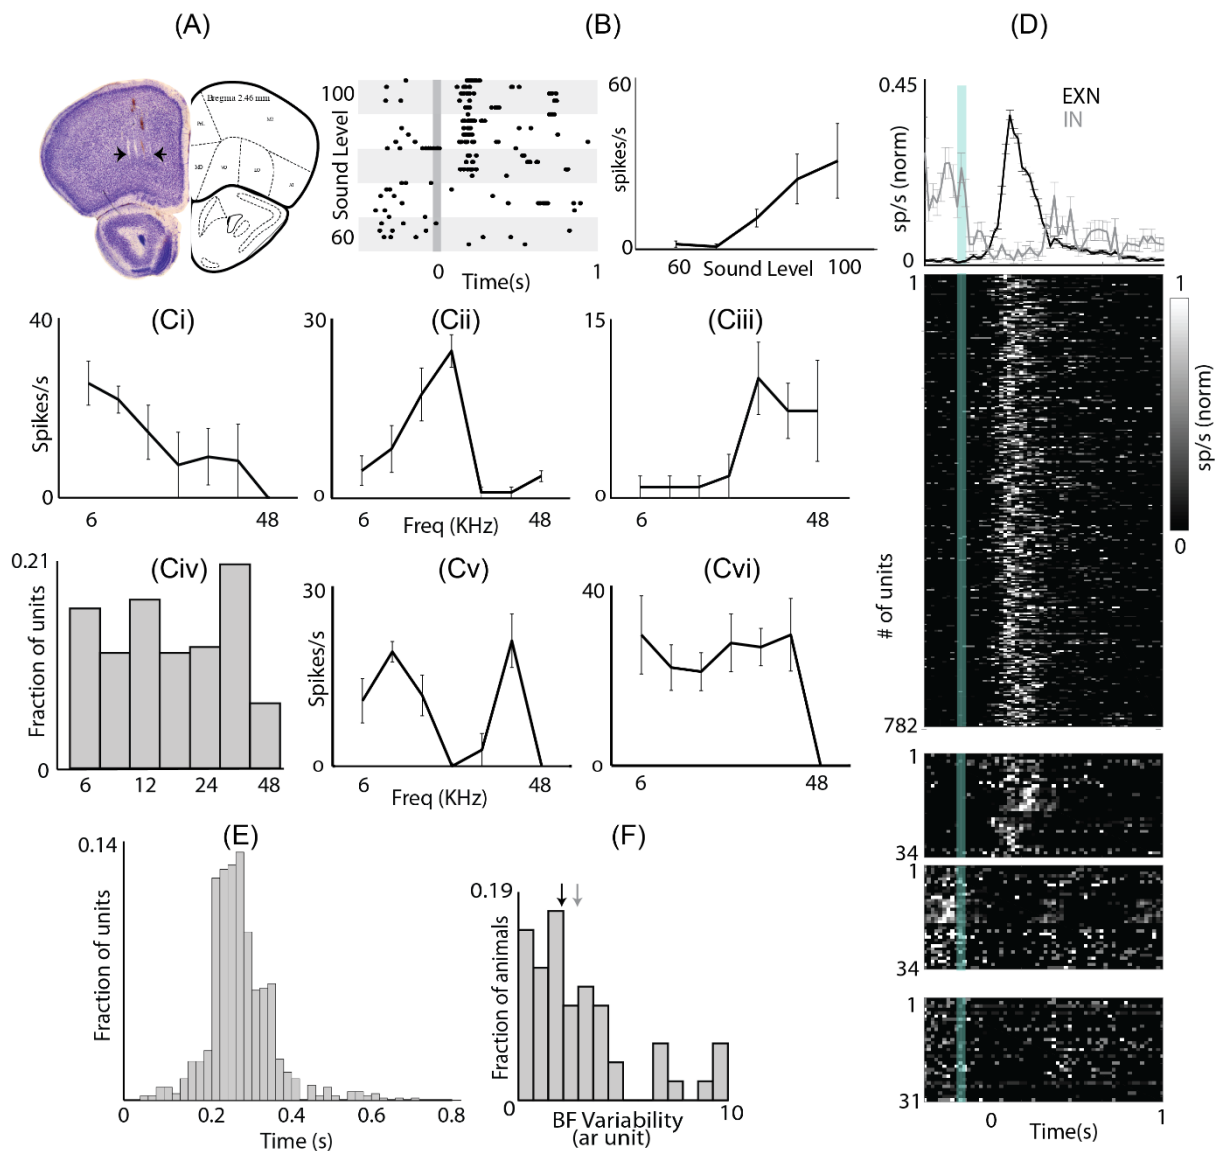

1166 **Figure 1 – OFC responds to auditory stimulation.**

1167 (A) Nissl stain of OFC section showing electrode tracks. Black arrows mark the medio-lateral  
 1168 extent of the electrode array. (B) an example unit showing responses to increasing intensities  
 1169 of broadband noise in raster plot (left) and rate-level curve (right). (Ci-iii) Tuning curves of  
 1170 three example units tuned to low (Ci), mid (Cii) and high (Ciii) frequencies. (Civ) Distribution  
 1171 of units tuned to different frequencies. (Cv) An example unit with bimodal tuning curve. (Cvi)  
 1172 An example unit with broad tuning curve (D) top: mean normalized PSTH  $\pm$  SEM of all units  
 1173 showing excitation (black) and inhibition (grey) upon auditory stimulation. Bottom; individual  
 1174 unit's PSTH (upper panel: units showing excitation, middle two panels: units showing  
 1175 excitation to some frequency and inhibition to some other frequency, lower panel: units  
 1176 showing inhibition). (E) distribution of peak response latency to the BF. (F) Spatial BF  
 1177 variability. Black arrow marks the median of the distribution and grey arrow marks the median  
 1178 of the distribution of completely random BF organization.  
 1179



1180 **FIGURE 2**

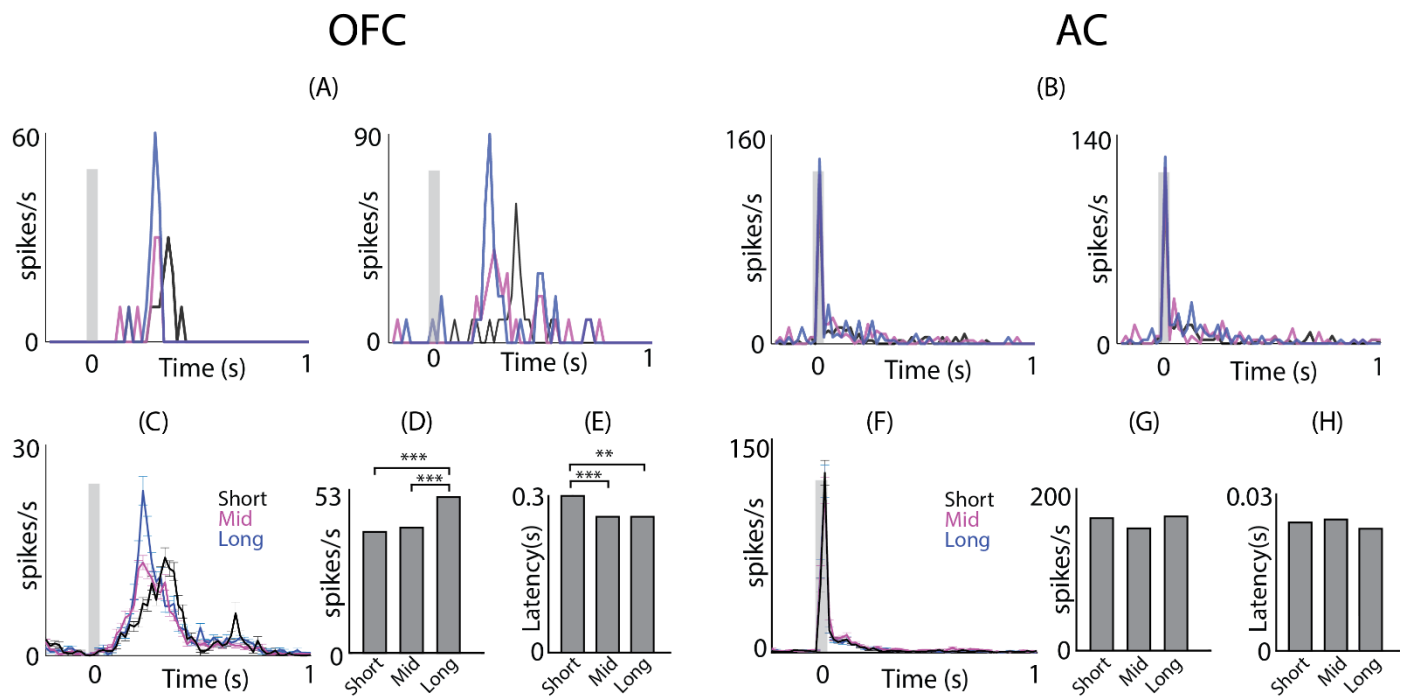

1181 **Figure 2 – OFC neurons show long timescales of adaptation**

1182 (A) Psth of two example units in the OFC at different ITIs (black; less than 5 secs (short),  
 1183 magenta; between 5 and 7 secs (mid), blue; more than 7 secs up to 11 secs (long)). (B) Similar  
 1184 to (A) in the AC (C) mean population PSTH  $\pm$  SEM at different ITIs in the OFC (D) Mean  
 1185 peak spike rate in the OFC (E) mean peak response latency in the OFC (F) mean population  
 1186 PSTH  $\pm$  SEM at different ITIs in the AC (G) mean peak spike rate in the AC (H) mean peak  
 1187 response latency in the AC  
 1188

1189 **FIGURE 3**

1190

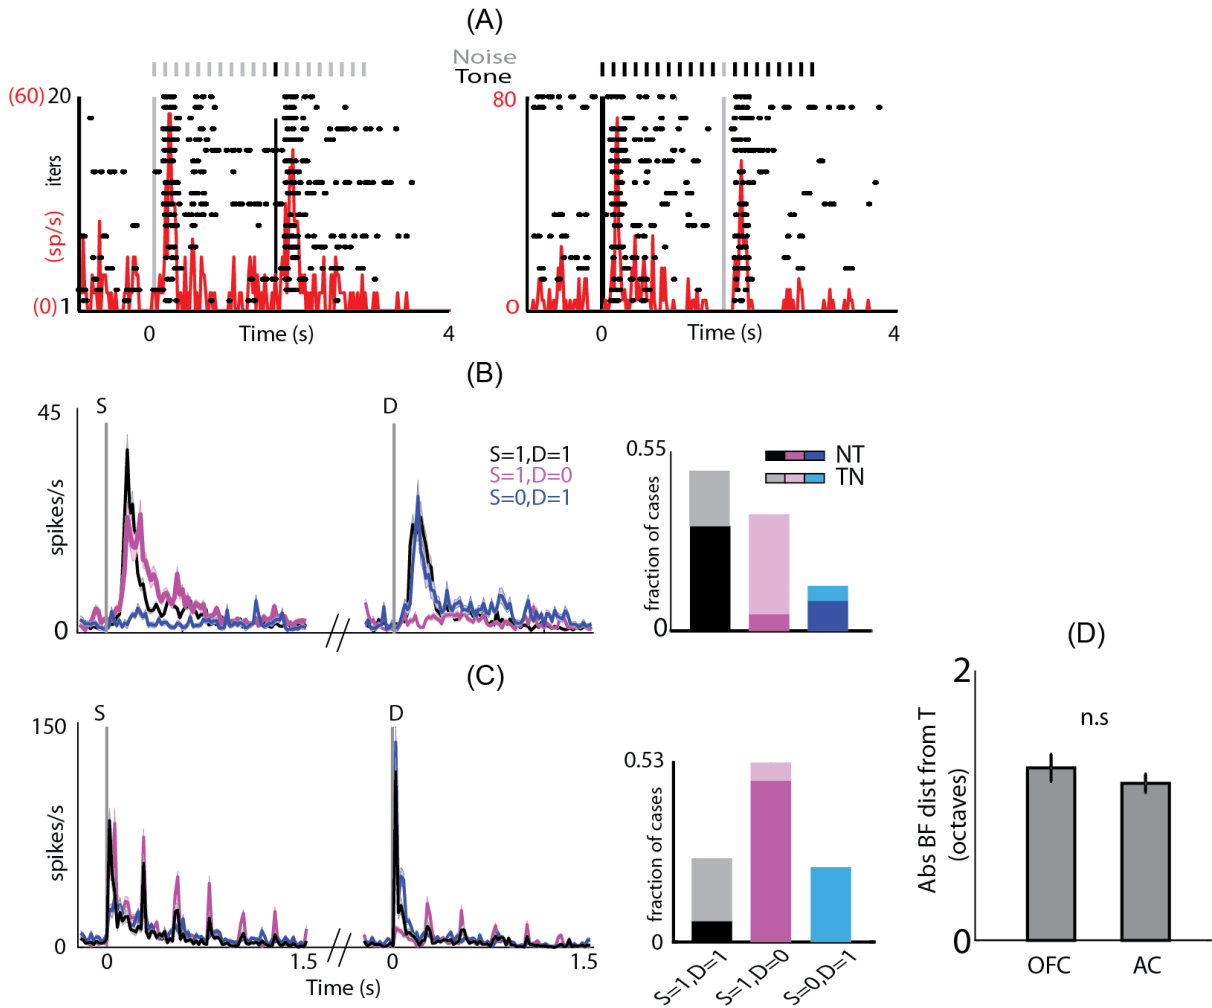

1191

1192

1193 **Figure 3 – Pure Deviant Detection in OFC unlike AC (i)**

1194 (A) An example unit showing auditory response (raster (black) and PSTH (red) to an odd-ball

1195 stimulus where noise is played as standard and tone as deviant (NT; left) and its swap

1196 (right). The vertical lines mark the onset of standard and deviant (grey for noise and black for

1197 tone). (B) (left) Mean population PSTH  $\pm$  SEM of units responding to both standard onset and

1198 deviant (S=1, D=1; black), responding only to standard onset (S=1, D=0; magenta) and

1199 responding only to deviant (S=0, D=1; blue). Right: Fraction of units belonging to different

1200 categories as described in (B). The darker shades show the fraction of units belonging to NT

1201 and lighter shades show fraction of units belonging to TN group. (C) Similar to (B) in the AC.

1202 (D) mean ( $|BF-Tf|$ ) in the NT-TN oddball stimuli in the OFC and AC

1203

1204 **FIGURE 4**

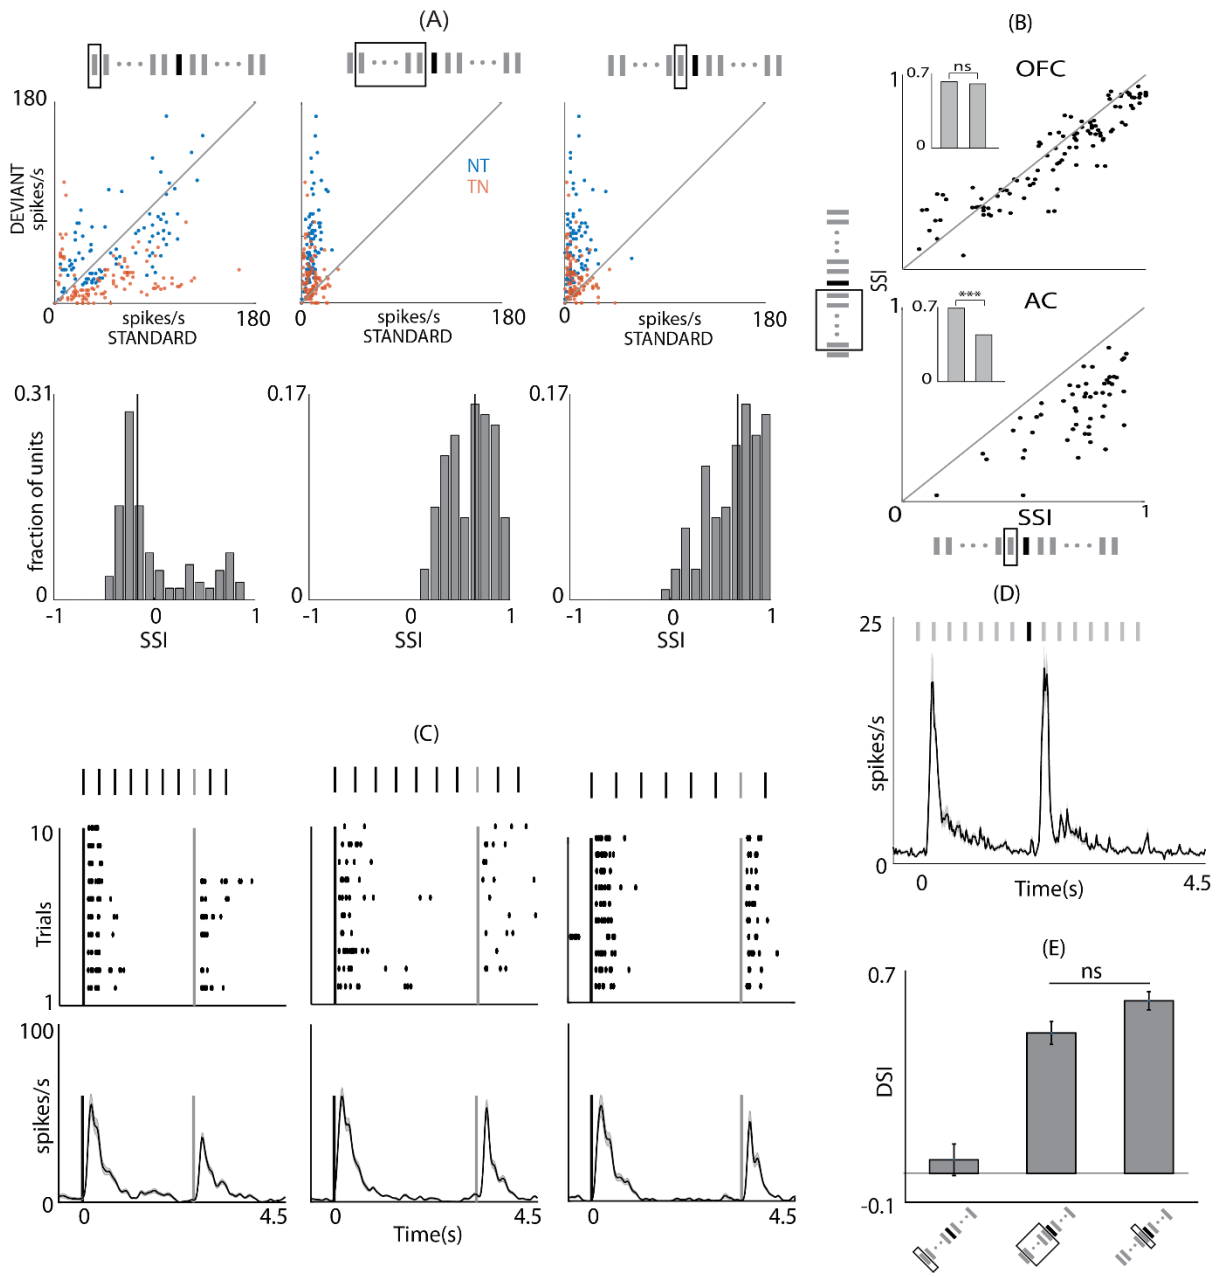

1205

1206 **Figure 4 – Pure Deviant Detection in OFC unlike AC (ii)**

1207 (A) Top: Scatter plot of mean spike rate at standard and deviant in NT (blue) and TN (orange).  
 1208 The spike rates for standard was calculated either considering the  $S_1$  (left), or  $S_{ALL}$  (middle) or  
 1209  $S_{PT}$  (right). The tokens considered in the two cases are enclosed in the grey rectangle. The  
 1210 histograms at the bottom show the CSIs computed by using three different standards as  
 1211 described in (A). (B) Scatter plot of CSIs in OFC (top) and AC (bottom) calculated by taking  
 1212  $S_{ALL}$  and  $S_{PT}$ . The mean CSIs in the two cases are shown in the bar plots in the inset. (C) Top:  
 1213 Raster plots of example units in response to odd-ball stimulus with different inter-token  
 1214 interval; 300 ms (left), 400 ms (middle) and 500 ms (right). Bottom: mean population PSTH  
 1215 for these intervals. (D) Mean population PSTH to tone-tone odd-ball stimulus. (E) Mean DSI  
 1216 for tone-tone odd-ball stimulus with three different standards as described in (A).

1217 **FIGURE 5**

1218

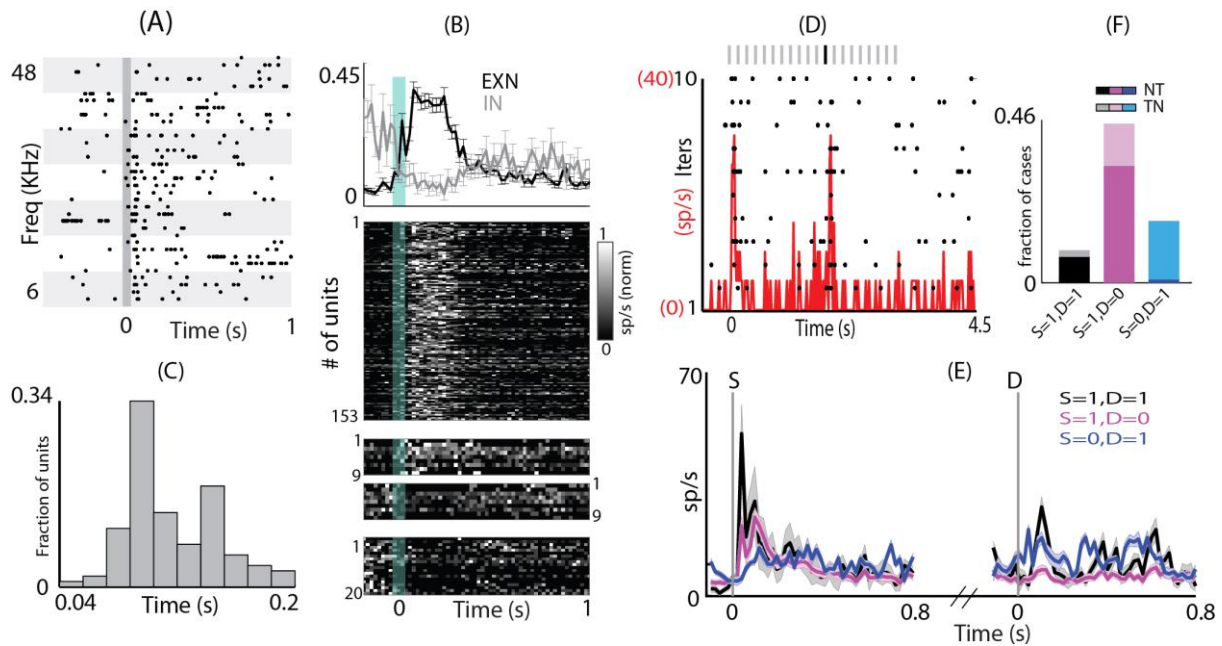

1219

1220 **Figure 5 – Awake mouse OFC also shows deviance detection**

1221

1222 (A) Raster plot of an example unit in the OFC showing responses to tones of different  
 1223 frequencies in awake condition. (B) Top: mean normalized PSTH  $\pm$  SEM of all units showing  
 1224 excitation (black) and inhibition (grey) upon auditory stimulation. Bottom: individual unit's  
 1225 PSTH (upper panel: units showing excitation, middle two panels: units showing excitation to  
 1226 some frequency and inhibition to some other frequency, lower panel: units showing inhibition)  
 1227 (C) A distribution of peak response latency in the awake condition. (D) Raster plot (black) and  
 1228 PSTH (red) of an example unit showing responses to odd ball stimulus. (E) Mean population  
 1229 PSTH  $\pm$  SEM of units responding to both standard onset and deviant (S=1, D=1; black),  
 1230 responding only to standard onset (S=1, D=0; magenta) and responding only to deviant (S=0,  
 1231 D=1; blue). (F) Fraction of units belonging to different categories as described in (E). The  
 1232 darker shades show the fraction of units belonging to NT and lighter shades show fraction of  
 1233 units belonging to TN group.

1234

1235 **FIGURE 6**

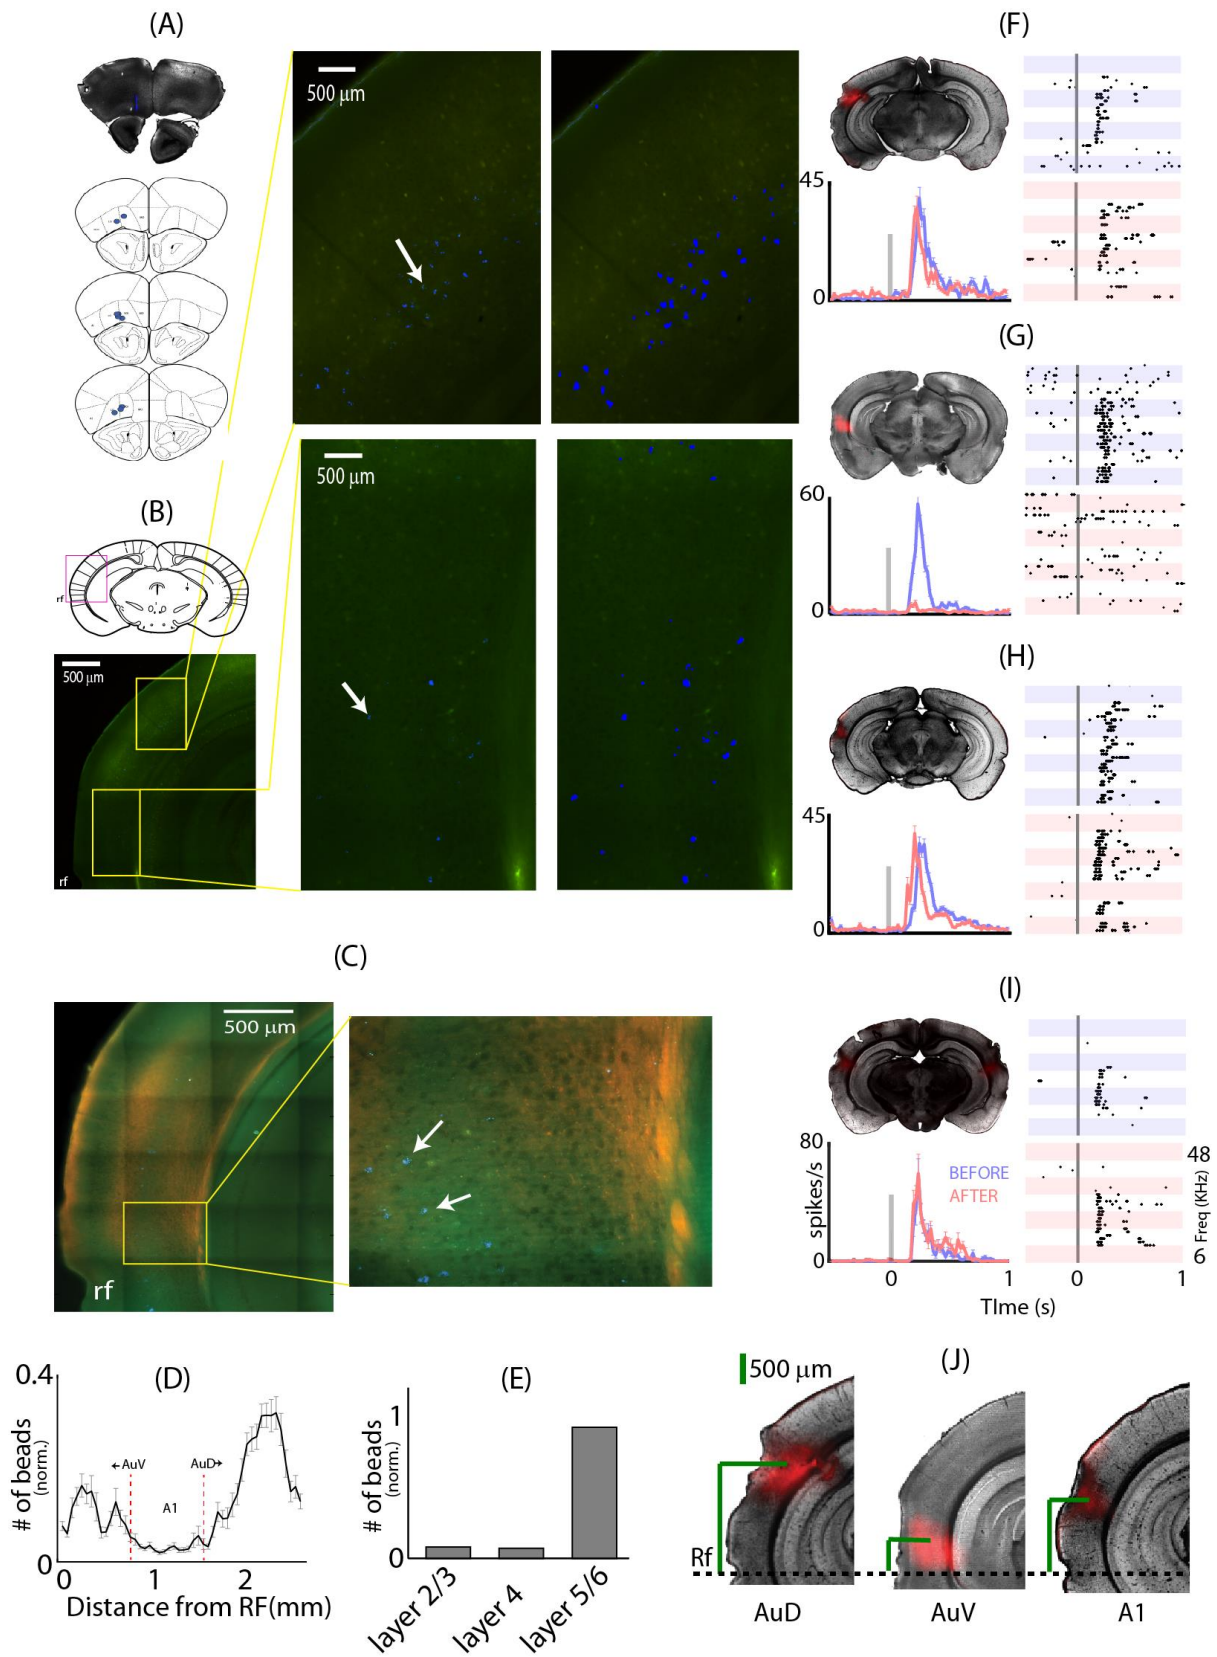

1237 **Figure 6 – Distinct contributions of AC divisions in OFC auditory responses**

1238 (A) Top: Coronal brain section showing retrobeads injection site (white arrow) in the OFC.  
1239 Bottom: Injection sites in all 9 animals (B) Top left: coronal brain section from mouse atlas  
1240 showing auditory cortex. Magenta box roughly marks the part of the brain region shown in  
1241 bottom left image. Bottom left: regions of AuD and AuV are marked in the yellow box. rf:  
1242 rhinal fissure. Middle: AuD (top) and AuV (bottom) showing labeled cell bodies (white arrows)  
1243 by the retrograde transported beads from OFC. Right: Same regions with enhanced intensities  
1244 of the blue pixels for easy visualization of the beads. (C) Left: Brain section showing layer 4  
1245 of the AC labelled with AAV-mcherry injected in the MGBv. Right; zoomed in image of the  
1246 area inside the yellow box on the left showing beads. (D) Mean number of beads as a function  
1247 of distance from the rf. Dashed red lines mark the extent of A1 (E) Laminar distribution of  
1248 beads in the AC (F) Brain section showing block site in the AuD; Raster plots of an example  
1249 unit before and after silencing the AuD; mean population PSTH  $\pm$  SEM before (blue) and after  
1250 (red) silencing the AuD. Vertical grey line is the stimulus time. (G) Brain section showing  
1251 block site in the AuV; Raster plots of an example unit before and after silencing the AuV; mean  
1252 population PSTH  $\pm$  SEM before (blue) and after (red) silencing the AuV. (H) Brain section  
1253 showing block site in the A1; Raster plots of an example unit before and after silencing the A1;  
1254 mean population PSTH  $\pm$  SEM before (blue) and after (red) silencing the A1. (I) Brain section  
1255 showing dual block sites in both A1; Raster plots of an example unit before and after silencing  
1256 both the A1s; mean population PSTH  $\pm$  SEM before (blue) and after (red) silencing both the  
1257 A1s. (J) Block sites in the AuD, AuV and A1 from the rf.  
1258

1259 **FIGURE 7**

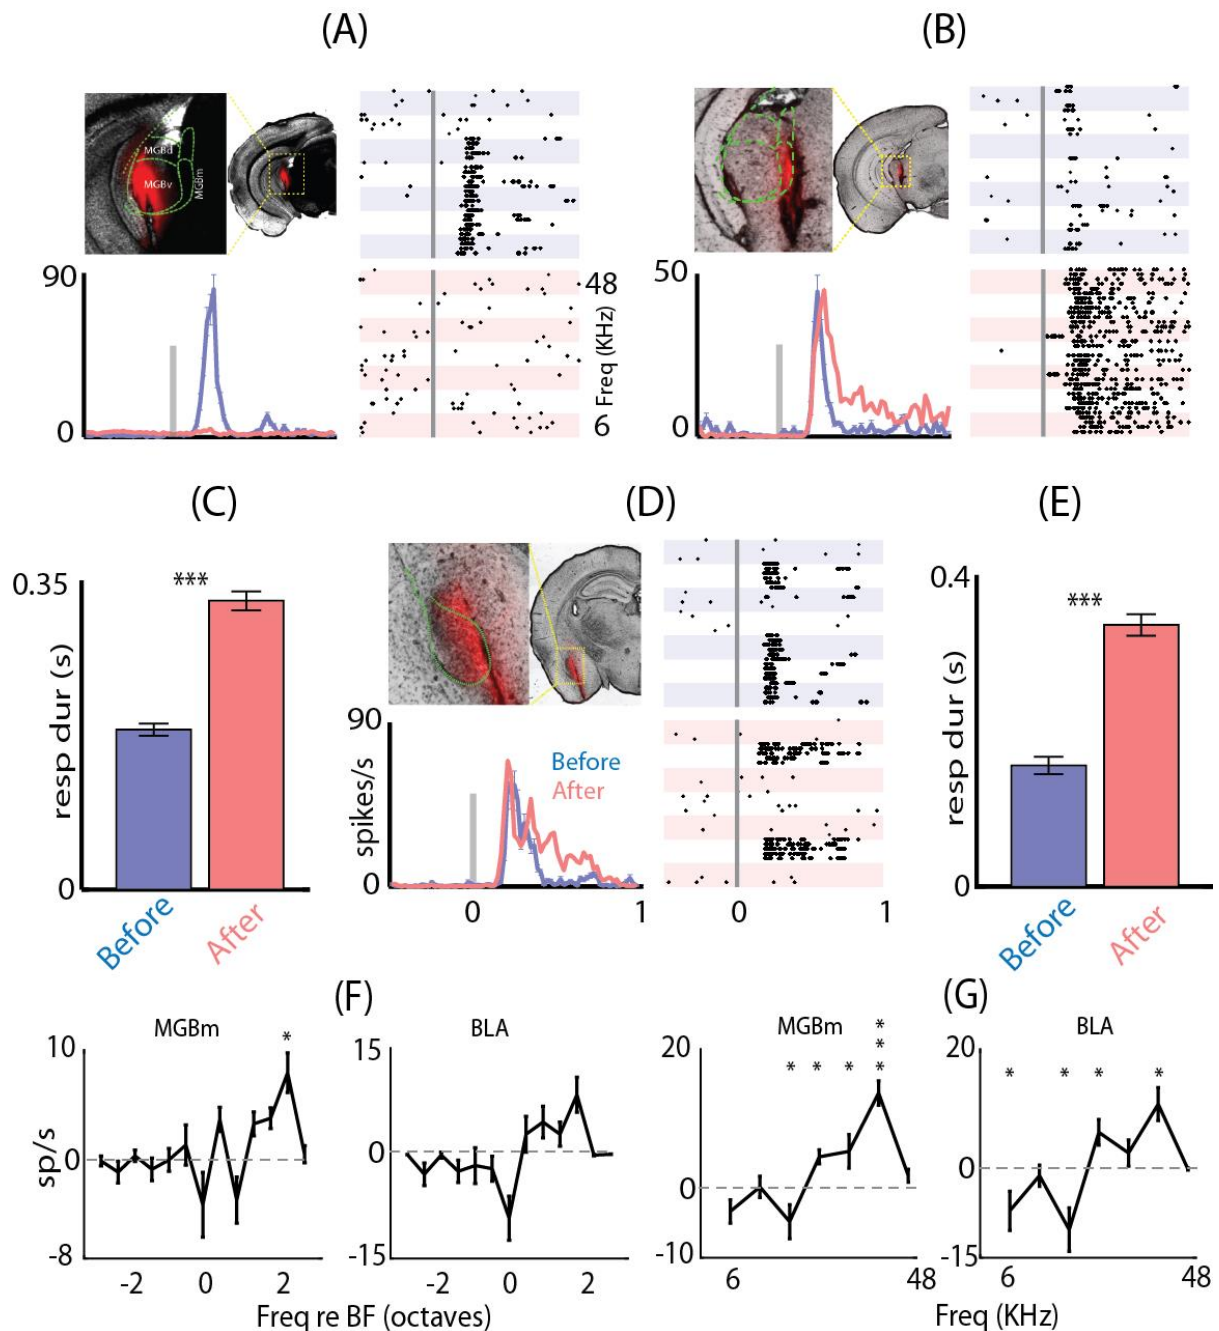

1260 **Figure 7 – Parallel excitatory and inhibitory contributions to OFC auditory responses**  
 1261 **originate in the lemniscal and non-lemniscal auditory thalamic nuclei**  
 1262

1263 (A) Brain section showing block site in the MGBv; Raster plots of an example unit before and  
 1264 after silencing the MGBv; mean population PSTH  $\pm$  SEM before (blue) and after (red) silencing  
 1265 MGBv. Vertical grey line is the stimulus time. (B) Brain section showing block site in the  
 1266 MGBm; Raster plots of an example unit before and after silencing the MGBm; mean  
 1267 population PSTH  $\pm$  SEM before (blue) and after (red) silencing the MGBm. (C) Mean response  
 1268 duration before and after silencing the MGBm (D) Brain section showing block site in the  
 1269 BLA; Raster plots of an example unit before and after silencing the BLA; mean population  
 1270 PSTH  $\pm$  SEM before (blue) and after (red) silencing the BLA. (E) Mean response duration

1271 before and after silencing the BLA. Mean inhibitory inputs into OFC, from MGBm and BLA  
1272 as a function of (F) frequency with respect to BF and (G) absolute frequency.  
1273



1274 **FIGURE 8**

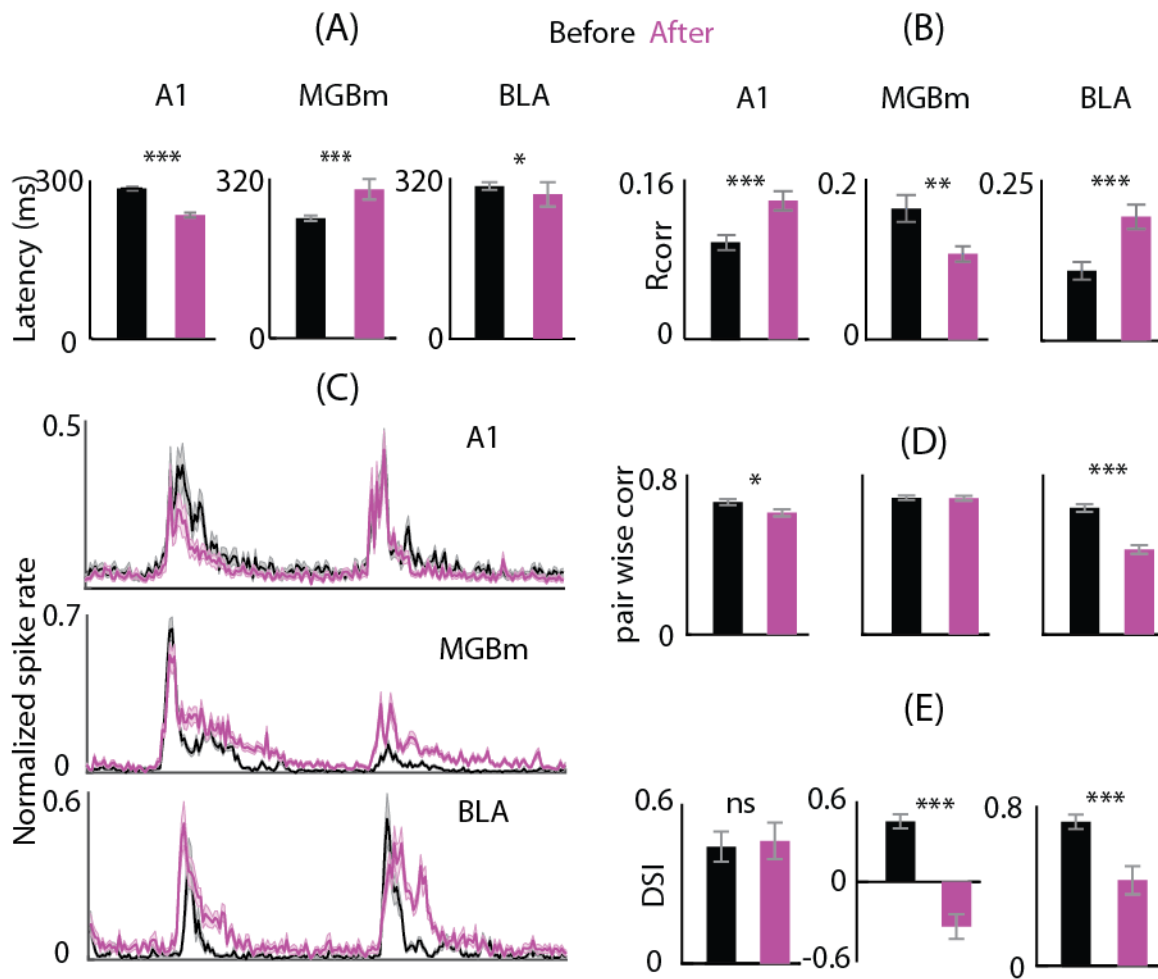

1275

1276 **Figure 8 – Both OFC deviant selectivity and spike time based response properties are**  
 1277 **shaped by the nonlemniscal pathway unlike by A1**

1278

1279 (A) Mean population latency  $\pm$  sem to pure tones before (black) and after (magenta) silencing  
 1280 A1 (left), MGBm (middle) and BLA (right). (B) Mean population reliability ( $R_{corr}$ )  $\pm$  SEM  
 1281 before (black) and after (magenta) silencing A1 (left), MGBm (middle) and BLA (right). (C)  
 1282 Mean population PSTH  $\pm$  SEM in response to odd ball stimulus before (black) and after  
 1283 (magenta) silencing A1 (top), MGBm (middle) and BLA (bottom). (D) Mean population  
 1284 pairwise correlations  $\pm$  SEM before (black) and after (magenta) silencing A1 (left), MGBm  
 1285 (middle) and BLA (right). (E) Mean population DSI  $\pm$  SEM before (black) and after (magenta)  
 1286 silencing A1 (left), MGBm (middle) and BLA (right).

1287
